# Supplementary material for: Effect of the public disclosure of industry payments information on patients: results from a population-based natural experiment
Source: PubMed Central journal article supplement — BMJ Open. 2019 Mar 1;9(2):e024020. doi: 10.1136/bmjopen-2018-024020 (PMC6398799; doi:10.1136/bmjopen-2018-024020), 2019-03-01
Supplement: bmjopen-2018-024020.draft_revisions.pdf [file bmjopen-2018-024020.draft_revisions.pdf]

# BMJ Open

BMJ Open is committed to open peer review. As part of this commitment we make the peer review history of every article we publish publicly available.

When an article is published we post the peer reviewers' comments and the authors' responses online. We also post the versions of the paper that were used during peer review. These are the versions that the peer review comments apply to.

The versions of the paper that follow are the versions that were submitted during the peer review process. They are not the versions of record or the final published versions. They should not be cited or distributed as the published version of this manuscript.

BMJ Open is an open access journal and the full, final, typeset and author-corrected version of record of the manuscript is available on our site with no access controls, subscription charges or pay-per-view fees (<http://bmjopen.bmj.com>).

If you have any questions on BMJ Open's open peer review process please email [editorial.bmjopen@bmj.com](mailto:editorial.bmjopen@bmj.com)

# BMJ Open

## Effect of the Public Disclosure of Industry Payments Information on Patients: Results from a Population-Based Natural Experiment

|                               |                                                                                                                                                                                                                                                                                            |
|-------------------------------|--------------------------------------------------------------------------------------------------------------------------------------------------------------------------------------------------------------------------------------------------------------------------------------------|
| Journal:                      | <i>BMJ Open</i>                                                                                                                                                                                                                                                                            |
| Manuscript ID                 | bmjopen-2018-024020                                                                                                                                                                                                                                                                        |
| Article Type:                 | Research                                                                                                                                                                                                                                                                                   |
| Date Submitted by the Author: | 10-May-2018                                                                                                                                                                                                                                                                                |
| Complete List of Authors:     | Kanter, Genevieve; University of Pennsylvania Perelman School of Medicine, General Internal Medicine<br>Carpenter, Daniel; Harvard University<br>Lehmann, Lisa; Harvard Medical School<br>Mello, Michelle; Stanford University Stanford Law School; Stanford University School of Medicine |
| Keywords:                     | MEDICAL ETHICS, Health policy < HEALTH SERVICES ADMINISTRATION & MANAGEMENT, HEALTH ECONOMICS                                                                                                                                                                                              |
|                               |                                                                                                                                                                                                                                                                                            |

SCHOLARONE™  
Manuscripts

Peer Review Only

1  
2  
3 **EFFECT OF THE PUBLIC DISCLOSURE OF INDUSTRY PAYMENTS INFORMATION ON PATIENTS:**  
4  
5 **RESULTS FROM A POPULATION-BASED NATURAL EXPERIMENT**

6  
7 Genevieve P. Kanter, PhD<sup>1</sup>

8 Daniel Carpenter, PhD<sup>2</sup>

9  
10 Lisa Soleymani Lehmann, MD PhD<sup>3</sup>

11  
12 Michelle M. Mello, JD PhD<sup>4</sup>  
13  
14  
15

16 <sup>1</sup> Division of General Internal Medicine and Department of Medical Ethics and Health Policy,  
17 University of Pennsylvania Perelman School of Medicine, and Leonard Davis Institute of  
18 Health Economics, University of Pennsylvania; 1312-B Blockley Hall, 423 Guardian Drive,  
19 Philadelphia, PA 19104, USA; Tel 215.898.2703; Email gpkanter@penmedicine.upenn.edu.  
20  
21  
22  
23 *(Corresponding author)*  
24

25 <sup>2</sup> Department of Government and Radcliffe Institute for Advanced Study, Harvard University;  
26 1737 Cambridge Street, CGIS Knafel Building 405, Cambridge, MA 02138, USA; Tel  
27 617.495.8280; Email dcarpenter@gov.harvard.edu.  
28  
29

30  
31 <sup>3</sup> Department of Medicine and Center for Bioethics, Harvard Medical School, and Department  
32 of Health Policy and Management, Harvard T. H. Chan School of Public Health, Boston, MA;  
33 National Center for Ethics in Health Care, Veterans Health Administration, Washington, DC;  
34 810 Vermont Avenue NW, Washington DC 20420, USA; Tel 202.632.8457; Email  
35  
36  
37  
38  
39 lisa.lehmann@va.gov.

40 <sup>4</sup> Stanford Law School and Department of Health Research and Policy, Stanford University  
41 School of Medicine; 559 Nathan Abbott Way, Stanford, CA 94305, USA; Tel 650.725.3894;  
42  
43  
44  
45  
46 Email mmello@law.stanford.edu.

47 Word Count: 2177 (excluding title page, abstract, references, figures, and tables)

48  
49 Keywords: physician industry relationships, Open Payments, public disclosure, transparency,  
50  
51 industry payments, conflicts of interest, patient awareness  
52  
53  
54  
55  
56  
57

## ABSTRACT

### Objective

To determine the effect of the public disclosure of industry payments to physicians on patients' awareness of industry payments and knowledge about whether their physicians had accepted industry payments.

### Design

Interrupted time series with comparison group (difference-in-difference analyses of longitudinal survey).

### Setting

Nationally representative US population-based surveys. Surveys were conducted in September 2014, shortly prior to the public release of Open Payments information, and again in September 2016.

### Participants

Adults aged 18 and older (n=2,180).

### Main outcome measures

Awareness of industry payments as an issue; awareness that industry payments information was publicly available; knowledge of whether own physician had received industry payments.

### Results

Public disclosure of industry payments information through Open Payments did not significantly increase the proportion of respondents who knew whether their physician had received industry payments ( $p=0.918$ ). It also did not change the proportion of respondents who became aware of the

1  
2  
3 issue of industry payments ( $p=0.470$ ) but did increase the proportion who knew that payments  
4  
5 information was publicly available (9.6% points,  $p=0.011$ ).  
6  
7  
8  
9

### 10 **Conclusions**

11  
12 Two years after the public disclosure of industry payments information, Open Payments does not  
13  
14 appear to have achieved its goal of increasing patient knowledge of whether their physicians have  
15  
16 received money from pharmaceutical and medical device firms. Additional efforts will be required to  
17  
18 improve the utilization and effectiveness of Open Payments for consumers.  
19  
20  
21  
22  
23  
24  
25  
26  
27  
28  
29  
30  
31  
32  
33  
34  
35  
36  
37  
38  
39  
40  
41  
42  
43  
44  
45  
46  
47  
48  
49  
50  
51  
52  
53  
54  
55  
56  
57  
58  
59  
60

## STRENGTHS AND LIMITATIONS

- This is the first national policy evaluation of the effect of transparency of industry payments on patients.
- Findings are based on a strong natural experiment design: interrupted time series with comparison group (difference-in-difference).
- Nationally representative sample of respondents was followed longitudinally.
- Individuals lost to attrition between survey waves may have been different from those who completed the second wave.

## INTRODUCTION

In 2010, the United States Congress—concerned about the adverse influence of financial relationships between physicians and drug and device firms, and the lack of transparency surrounding these relationships—enacted the Physician Payments Sunshine Act.[1] As part of reforms included in the Affordable Care Act (ACA),[2] the Sunshine provision required pharmaceutical and medical device firms to report, for public release, detailed information on the financial payments and gifts of monetary value that these firms made to physicians. Payments for consulting and for serving as faculty speaker at continuing medical education events and conferences; for food/drink, travel, lodging, and entertainment; as well as for royalties and research were to be reported for public disclosure. The rationales underlying this disclosure requirement were that patients, in making health care decisions, would be better informed of the potential influence of industry ties on their physicians, and payment transparency could deter physicians from accepting payments that patients might view as suspect.[1,3]

Since the passage of the US Sunshine Act, similar initiatives have emerged in Europe and Canada. The European Federation of Pharmaceutical Industries and Associations (EFPIA) now requires, of its member countries, the public disclosure of pharmaceutical industry payments made to health care providers, although health care workers in some countries can refuse consent to the public disclosure of their individual-level information.[4,5] In Britain, industry payments to health care providers have been reported through the Disclosure UK programme as part of the EFPIA initiative,[6,7] with approximately 70% of providers participating in public disclosure.[8] In Ontario, Canada, legislation has been introduced requiring the public

1  
2  
3 disclosure of payments made by pharmaceutical and medical device firms to health care  
4  
5 providers.[9,10]  
6  
7

8           The degree to which these transparency initiatives improve, in practice, patient  
9  
10 awareness and knowledge of industry payments has not been previously studied. We sought to  
11  
12 rigorously evaluate the effects of the earliest of these industry payments transparency  
13  
14 initiatives: the Open Payments programme created by the US Physician Payments Sunshine Act.  
15  
16 In a national longitudinal survey fielded before and after the Sunshine Act's data release in  
17  
18 2014, we investigated awareness and knowledge of industry payments to physicians among a  
19  
20 representative cohort of American adults. Because 3 US states had already made industry  
21  
22 payments information publicly available, respondents in these states served as a comparison  
23  
24 group (since they already had prior exposure to this information) for those who became newly  
25  
26 apprised of payments information with the release of Open Payments data. This design  
27  
28 improves on a simple pre/post design and allows for a better-controlled evaluation of the effect  
29  
30 of the Sunshine Act. Findings from the US experience can guide implementation of  
31  
32 transparency programmes in other countries.  
33  
34  
35  
36  
37  
38  
39  
40  
41

## 42 **DATA AND METHODS**

### 43 **Sample**

44  
45           The sample for our initial survey consisted of 3,542 American adults aged 18 and older  
46  
47 selected from KnowledgePanel (KP), a large, nationally representative US household panel  
48  
49 maintained by the research firm GfK. KP households are selected through address-based  
50  
51  
52  
53  
54  
55  
56  
57



1  
2  
3 sampling so that the sampling frame covers 97% of US households, including non-Internet  
4  
5 households. Details on survey sampling methodology are provided in Appendix S1.  
6  
7

8 We drew a nationally representative sample with oversampling in Massachusetts and  
9  
10 Minnesota to enable us to detect smaller effects in these two states, which had previously  
11  
12 passed "Sunshine laws" requiring the public disclosure of industry payments made to physicians  
13  
14 in the state. (We did not oversample Vermont, which also had a preexisting disclosure law,  
15  
16 because an oversample of this relatively small population would still not have generated  
17  
18 sufficient power to detect an effect in that state.) We refer to these two states and Vermont as  
19  
20 "Sunshine states."  
21  
22  
23  
24

25 The sample of respondents for the follow-up survey consisted of the group of all Wave 1  
26  
27 respondents who were available for re-contact (2,711/3,542=77%). Appendix S2 shows the flow  
28  
29 diagram for sample selection. Individuals who were not available for re-contact were more  
30  
31 likely to be racial/ethnic minorities and not be in paid employment than those who were re-  
32  
33 contacted, but were similar along most other dimensions (Appendix S3).  
34  
35  
36  
37  
38  
39

#### 40 **Patient and public involvement statement**

41  
42 The study did not involve patients. The results of the survey will be given to GfK for  
43  
44 dissemination.  
45  
46  
47  
48  
49

#### 50 **Survey Design**

51  
52 GfK administered the 6-minute Wave 1 survey and the 10-minute Wave 2 survey online.  
53  
54 Both surveys included items on awareness and knowledge of industry payments (questions  
55  
56  
57  
58  
59  
60

1  
2  
3 provided in Appendix S4). In particular, we asked whether respondents were aware of the issue  
4  
5 of industry payments, knew that industry payments information was publicly available, and  
6  
7 knew if the physician they had seen most frequently during the past 12 months had received  
8  
9 payments. Survey data were linked to information on respondents' sociodemographic and self-  
10  
11 reported health characteristics provided by GfK.  
12  
13  
14  
15  
16  
17

### 18 **Survey Administration**

19  
20 The first survey was fielded September 26-October 3, 2014, with almost all surveys  
21  
22 (94%) completed by the Open Payments data release date of September 30. Details on  
23  
24 administration of the Wave 1 survey are available elsewhere.[11]  
25  
26

27 The Wave 2 survey was fielded September 16-October 2, 2016, two years after the  
28  
29 initial survey. Appendix S1 provides further details on Wave 2 survey administration.  
30  
31  
32  
33  
34

### 35 **Statistical Analysis**

36  
37 We used a difference-in-difference approach (interrupted time-series with control) to  
38  
39 estimate the effects of the national, public release of Open Payments information.[12-14] To  
40  
41 estimate the effect of the Open Payments release, we compared mean changes in the  
42  
43 outcomes of interest among individuals residing in states that did not have state Sunshine laws  
44  
45 to changes among persons residing in states with Sunshine laws (Massachusetts, Minnesota,  
46  
47 and Vermont). By using the Sunshine states as comparators, we could improve on a simple  
48  
49 pre/post study design and account for secular trends affecting all states--for example, changes  
50  
51  
52  
53  
54  
55  
56  
57  
58  
59  
60

1  
2  
3 associated with the ACA--that otherwise could have confounded our estimates of the effect of  
4  
5 payments disclosure.  
6

7  
8 We calculated unadjusted and adjusted difference-in-difference effects. Regression-  
9  
10 adjusted models—used to increase precision of the estimates--included age, education  
11  
12 categories, urban residence, household income categories, employment categories, previous  
13  
14 diagnosis of any of 21 chronic conditions, previous diagnosis of cancer, previous diagnoses of  
15  
16 stroke or myocardial infarction, previous diagnosis of a mental health disorder, number of  
17  
18 physician visits, whether insured, quadratic terms of age and number of visits, year fixed  
19  
20 effects, and individual fixed effects (which absorb gender, race/ethnicity, and other time-  
21  
22 invariant individual characteristics). Standard errors were clustered at the state level. All  
23  
24 analyses used GfK-constructed longitudinal weights adjusting for non-coverage, nonresponse,  
25  
26 and oversampling.  
27  
28  
29  
30  
31

32 Analyses were conducted using Stata 14 (College Station, TX). Full regression results for  
33  
34 models with and without individual fixed effects are reported in Appendix S5. Results from  
35  
36 alternative specifications, including unweighted models, are reported in Appendix S6.  
37  
38  
39  
40  
41

## 42 **RESULTS**

### 43 **Sample Characteristics**

44  
45 Of the 2,711 respondents from Wave 1 who were re-contacted, 80% completed the  
46  
47 survey, for an overall completion rate of 62%. (A non-response analysis may be found in  
48  
49 Appendix S3.) Table 1 presents the characteristics of Wave 1 and Wave 2 respondents.  
50  
51  
52 Respondents in the two waves were similar along most sociodemographic and health  
53  
54  
55  
56  
57

1  
2  
3 dimensions. In the balanced panel consisting of individuals who responded to both surveys  
4  
5 (n=2,180), respondents who lived in Sunshine states (n=208, 4% weighted) were similar along  
6  
7 almost all dimensions to those who lived in non-Sunshine states (n=1,972).  
8  
9

### 10 11 12 13 **Effect of Disclosure on Awareness and Knowledge of Industry Payments** 14

15  
16 Columns 1 and 2 of Table 2 show, respectively, the unadjusted 2014 and 2016 levels of  
17  
18 awareness and knowledge of industry payments in Sunshine and non-Sunshine states among  
19  
20 individuals who responded to both survey waves. Prior to Open Payments, non-Sunshine state  
21  
22 residents had lower awareness of the issue of industry payments than residents of Sunshine  
23  
24 states (45.5% vs. 58.0%), as well as lower awareness that industry payments information was  
25  
26 publicly available (9.8% vs. 19.4%).  
27  
28

29  
30 After Open Payments, overall awareness of the issue increased in both Sunshine and  
31  
32 non-Sunshine states, with a relatively greater increase in awareness in non-Sunshine states  
33  
34 (8.7% points vs. 5.6% points). Awareness that industry payments information was publicly  
35  
36 available also increased more in non-Sunshine states relative to Sunshine states, which  
37  
38 exhibited a decline in reported awareness (3.2% points vs. -6.7% points). This decline likely  
39  
40 reflects the effect of media attention in the pre-period surrounding the Open Payments data  
41  
42 release, which activated short-term awareness that quickly decayed.  
43  
44  
45

46  
47 In both Sunshine and non-Sunshine states, a very small proportion of respondents  
48  
49 claimed to know whether their own doctor had received industry payments prior to the public  
50  
51 release of data (3.8% and 4.4%, respectively). In both types of states, this knowledge about  
52  
53 their own doctors changed little after the public release.  
54  
55  
56

Columns 4 and 5 of Table 2 compare the changes in awareness and knowledge in non-Sunshine states, which were newly exposed to the payments information, to changes in Sunshine states. Column 4 reports the unadjusted difference (DD) estimates of the effect of the Open Payments data release and Column 5 reports the regression-adjusted DD estimates of the effect. The DD estimates show that Open Payments did not increase awareness of the issue of industry payments ( $p=0.470$ ), but did significantly increase awareness that industry payments information was publicly available (9.6 % points,  $p=0.011$ ). The release of Open Payments data did not, however, increase knowledge about whether one's own doctor had received payments ( $p=0.918$ ).

## DISCUSSION

A key objective of the Sunshine Act was to improve the information available to patients about their physicians' financial ties with industry.[1,3] In this first national evaluation of the effect of the Sunshine Act on patients, we found that although Open Payments increased awareness that industry payments information was publicly available, it did not increase people's knowledge of whether their own doctor had received payments. Two years after the Open Payments release, 13% of respondents knew that industry payments information about their physicians was available, and only 3% of respondents knew whether their doctor had received payments. In this regard, Open Payments has fallen well short of its aspiration to better inform patients of their physicians' industry relationships.

Our findings are consistent with the experience of transparency initiatives in other areas of medicine. Studies of the effect of the disclosure of physician and hospital quality have shown

1  
2  
3 that patients have been largely unaware of and rarely use the information made available.[15-  
4  
5 17] Providers have been more responsive,[15,16] so Open Payments may well have effects on  
6  
7 physician behavior.  
8  
9

10 Our DD strategy provides estimates that are more credibly interpreted as causal—rather  
11  
12 than simply associational—because Sunshine states can be used as a comparison group.  
13  
14 Nevertheless, there are some limitations to the study. With DD, confounding might occur if  
15  
16 there were other aspects of the health care environment affecting awareness and knowledge of  
17  
18 industry payments that affected Sunshine states but not non-Sunshine states, or vice versa.  
19  
20 One possible source of confounding is that the three Sunshine states all participated in the  
21  
22 Medicaid expansion, possibly increasing patient engagement in these states. We conduct  
23  
24 sensitivity analyses, estimating models with an indicator for Medicaid expansion and models  
25  
26 restricting the sample to only residents in Medicaid expansion states; our findings are robust to  
27  
28 these adjustments (Appendix S6). We are not aware of other changes that would have  
29  
30 differentially affected Massachusetts, Minnesota, and Vermont versus non-Sunshine states  
31  
32 during this period. Secondly, a general concern raised with web-based household panels is that  
33  
34 refusal to participate in the panel could lead to sample non-representativeness relative to the  
35  
36 population. Previous studies have shown, however, that there appears to be very little bias in  
37  
38 the KN panel in the area of health and health-related behavior.[18,19] An additional concern is  
39  
40 that survey respondents may not have been fully representative of US households because of  
41  
42 attrition. Although the response rate among persons invited to take the Wave 2 survey was  
43  
44 high (80%), and the overall completion rate between the first and second survey was within  
45  
46 survey norms (62%), those who left the sample may have been different from those who  
47  
48  
49  
50  
51  
52  
53  
54  
55  
56  
57  
58  
59  
60

1  
2  
3 remained. In a separate analysis, we found that individuals lost to attrition had reported, during  
4  
5 Wave 1, less education and less health insurance coverage but were otherwise similar along  
6  
7 most other dimensions, including health status (Appendix S3). To correct for some of the  
8  
9 attrition bias, we used longitudinal weights that matched the distribution of key demographic  
10  
11 characteristics of our survey sample to the distribution of the US population (see Appendix S1).  
12  
13  
14

15 In summary, because very few patients are aware of, much less accessing, information  
16  
17 available through Open Payments, efforts beyond the unveiling of a public website will be  
18  
19 required to improve patient use of industry payments information. These efforts could come  
20  
21 from the Centers for Medicaid and Medicare Services (CMS), which oversees Open Payments  
22  
23 and also administers Medicare and Medicaid programmes; for example, CMS could use its pre-  
24  
25 existing relationships with Medicare and Medicaid beneficiaries to highlight payments  
26  
27 information and integrate it with other CMS resources that beneficiaries use regularly. More  
28  
29 broadly, health insurers could provide information about industry payments on “Find a  
30  
31 Physician” websites where patients go to select doctors from within a network. In addition,  
32  
33 physicians themselves who value their "pharm-free" status [20] could highlight this fact to  
34  
35 current and prospective patients.  
36  
37  
38  
39  
40  
41

42 As transparency efforts in Europe, Canada, and other regions advance, the US  
43  
44 experience suggests that web-based public disclosure is limited in its ability to inform patients  
45  
46 about physicians and their industry interests. Additional policy initiatives will likely be required  
47  
48 to widely disseminate this information and make it more salient for patients.  
49  
50  
51  
52  
53  
54  
55  
56  
57

## CONTRIBUTORSHIP STATEMENT

Study concept and design: Kanter, Mello

Acquisition, analysis, or interpretation of data: Kanter, Mello, Carpenter, Lehmann

Drafting of the manuscript: Kanter

Critical revision of the manuscript for important intellectual content: Kanter, Mello, Carpenter, Lehmann

Statistical analysis: Kanter

Administrative, technical, or material support: Kanter, Mello, Carpenter, Lehmann

Study supervision: Kanter

Dr. Kanter had full access to the data and takes full responsibility for the integrity of the data and the accuracy of the data analysis. All authors have read, revised, and approved the final version of the paper.

## DATA SHARING STATEMENT

No additional data are available.

## COMPETING INTERESTS

The authors have no competing interests to disclose.

## FUNDING

This research was funded by the Greenwall Foundation.



**REFERENCES**

1. Centers for Medicare and Medicaid Services. 42 CFR Parts 402 and 403. Medicare, Medicaid, children's health insurance programs; transparency reports and reporting of physician ownership or investment interests. Federal Register 78. 2013.  
<https://www.cms.gov/OpenPayments/Downloads/Affordable-Care-Act-Section-6002-Final-Rule.pdf>. Accessed April 26, 2018.
2. Section 6002 of the Patient Protection and Affordable Care Act. Public Law 111-148.  
<http://www.gpo.gov/fdsys/pkg/PLAW-111publ148/pdf/PLAW-111publ148.pdf>. Accessed April 26, 2018.
3. US Senate special committee on aging. Grassley, Kohl say public should know when pharmaceutical makers give money to doctors. Press release. September 7, 2007.  
<http://www.aging.senate.gov/press-releases/grassley-kohl-say-public-should-know-when-pharmaceutical-makers-give-money-to-doctors>. Accessed April 26, 2018.
4. European Federation of Pharmaceutical Industries and Associations. Disclosure of payments to HCPs. <https://www.efpia.eu/relationships-codes/disclosure-of-payments-to-hcps/>. Accessed April 26, 2018.
5. Bulik BS. 'Sunshine' hits Europe: Pharma's doc payments now available, but numbers are far from comprehensive. FiercePharma. July 25, 2016. <https://www.fiercepharma.com/marketing/sunshine-finally-reaches-europe-disclosure-pharma-payments-to-docs-now-available>. Accessed April 26, 2018.
6. Association of the British Pharmaceutical Industry. Disclosure UK. <http://www.abpi.org.uk/ethics/ethical-responsibility/disclosure-uk/>. Accessed April 26, 2018.

- 1  
2  
3 7. Adlington K, Godlee F. Disclosure UK: transparency should no longer be an optional extra.  
4  
5 BMJ 2016; 354:i3730 doi:10.1136/bmj.i3730.  
6  
7
- 8 8. Hawkes N. Doctors getting biggest payments from drug companies don't declare them on  
9  
10 new website. BMJ 2016; 354:i3679 doi:10.1136/bmj.i3679.  
11  
12
- 13 9. Hoskins E. Bill 160, Strengthening Quality and Accountability for Patients Act, 2017.  
14  
15 [http://ontla.on.ca/web/bills/bills\\_detail.do?locale=en&Intranet=&BillID=5096](http://ontla.on.ca/web/bills/bills_detail.do?locale=en&Intranet=&BillID=5096). Accessed  
16  
17 April 26, 2018.  
18  
19
- 20 10. Grant K. Ontario law to require drug firms to reveal funds paid to doctors' groups, patient  
21  
22 advocates. The Globe and Mail. February 22, 2018. [https://www.theglobeandmail.com/  
23  
24 news/national/ontario-law-to-require-drug-firms-to-reveal-funds-paid-to-doctors-groups-  
25  
26 patient-advocates/article38061619/](https://www.theglobeandmail.com/news/national/ontario-law-to-require-drug-firms-to-reveal-funds-paid-to-doctors-groups-patient-advocates/article38061619/). Accessed April 26, 2018.  
27  
28  
29
- 30 11. Pham-Kanter G, Mello MM, Lehmann LS, Campbell, EG, Carpenter D. Public awareness of  
31  
32 and contact with physicians who receive industry payments: a national survey. J Gen Intern  
33  
34 Med 2017; 32:767-774 doi 10.1007/s11606-017-4012-3.  
35  
36
- 37 12. Wooldridge JJ. Econometric analysis of cross section and panel Data. Cambridge, MA: MIT  
38  
39 Press; 2002.  
40  
41
- 42 13. Cameron CA, Trivedi PK. Microeconometrics: methods and applications. New York:  
43  
44 Cambridge University Press; 2005.  
45  
46
- 47 14. Shadish WR, Cook TD, Campbell DT. Experimental and quasi-experimental designs for  
48  
49 generalized causal inference. Boston: Houghton Mifflin; 2002.  
50  
51  
52  
53  
54  
55  
56  
57

- 1  
2  
3 15. Fung CH, LIM Y, Mattke S, Damberg C, Shekelle PG. Systematic review: the evidence that  
4 publishing patient care performance data improves quality of care. *Ann Intern Med* 2008;  
5 148:111-123.  
6  
7
- 8  
9  
10 16. Marshall MN, Shekelle PG, Leatherman S, Brook RH. The public release of performance  
11 data: what do we expect to gain? a review of the evidence. *JAMA* 2000; 283(14):1866-74.  
12  
13
- 14 17. Schauffler HH, Mordavsky JK. Consumer reports in health care: do they make a difference?  
15 *Annu Rev Public Health* 2001; 22:69-89.  
16  
17
- 18 18. Baker LC, Bundorf MK, Singer S, Wagner TH. Validity of the survey of health and internet  
19 and knowledge network's panel and sampling. Stanford, CA: Stanford University; 2003.  
20  
21
- 22 19. Huggins VJ, Dennis MJ, Seryakova K. An evaluation of nonresponse bias in internet surveys  
23 conducted using the knowledge networks panel. *Proceedings of the Survey Research  
24 Methods Section, Joint Statistical Meetings of the American Statistical Association* 2002;  
25 1525-1530.  
26  
27
- 28 20. AMSA. PharmFree: Promoting evidence-based prescribing, pharmaceutical innovation, and  
29 access to medicines. <http://www.pharmfree.org/>. Accessed April 26, 2018.  
30  
31  
32  
33  
34  
35  
36  
37  
38  
39  
40  
41  
42  
43  
44  
45  
46  
47  
48  
49  
50  
51  
52  
53  
54  
55  
56  
57

**Table 1. Characteristics Of Respondents By Wave And By Sunshine State Residence**

|                       | Weighted Distribution %   |                           | Statistical significance (Bonferroni correction) <sup>a</sup> | Weighted Distribution % <sup>b</sup> |              | Statistical significance (Bonferroni correction) <sup>a</sup> |
|-----------------------|---------------------------|---------------------------|---------------------------------------------------------------|--------------------------------------|--------------|---------------------------------------------------------------|
|                       | Wave 1, 2014<br>(n=3,542) | Wave 2, 2016<br>(n=2,180) |                                                               | Sunshine<br>Balanced Panel (n=2,180) | non-Sunshine |                                                               |
| Gender                |                           |                           | n.s.                                                          |                                      |              | n.s.                                                          |
| Female                | 52%                       | 52%                       |                                                               | 55%                                  | 52%          |                                                               |
| Male                  | 48%                       | 48%                       |                                                               | 45%                                  | 48%          |                                                               |
| Race/Ethnicity        |                           |                           | n.s.                                                          |                                      |              | **                                                            |
| Caucasian             | 66%                       | 65%                       |                                                               | 92%                                  | 63%          |                                                               |
| Hispanic              | 15%                       | 16%                       |                                                               | 3%                                   | 16%          |                                                               |
| Black, Non-Hispanic   | 11%                       | 12%                       |                                                               | 2%                                   | 12%          |                                                               |
| Other                 | 8%                        | 8%                        |                                                               | 2%                                   | 8%           |                                                               |
| Age                   |                           |                           | n.s.                                                          |                                      |              | n.s.                                                          |
| <=20                  | 4%                        | 2%                        |                                                               | 1%                                   | 5%           |                                                               |
| 21-30                 | 19%                       | 18%                       |                                                               | 15%                                  | 19%          |                                                               |
| 31-40                 | 16%                       | 17%                       |                                                               | 15%                                  | 17%          |                                                               |
| 41-50                 | 15%                       | 17%                       |                                                               | 15%                                  | 16%          |                                                               |
| 51-60                 | 21%                       | 21%                       |                                                               | 28%                                  | 21%          |                                                               |
| 61+                   | 25%                       | 26%                       |                                                               | 26%                                  | 22%          |                                                               |
| Education             |                           |                           | n.s.                                                          |                                      |              | n.s.                                                          |
| Less than high school | 12%                       | 11%                       |                                                               | 4%                                   | 13%          |                                                               |
| High school graduate  | 30%                       | 29%                       |                                                               | 28%                                  | 31%          |                                                               |
| Some college          | 29%                       | 29%                       |                                                               | 26%                                  | 27%          |                                                               |
| College graduate      | 29%                       | 32%                       |                                                               | 41%                                  | 29%          |                                                               |
| Household Income      |                           |                           | n.s.                                                          |                                      |              | *                                                             |
| \$0 - \$24,999        | 18%                       | 17%                       |                                                               | 8%                                   | 14%          |                                                               |
| \$25,000 - \$49,999   | 22%                       | 21%                       |                                                               | 15%                                  | 21%          |                                                               |

|    |                                             |     |     |      |     |      |
|----|---------------------------------------------|-----|-----|------|-----|------|
| 1  |                                             |     |     |      |     |      |
| 2  |                                             |     |     |      |     |      |
| 3  | \$50,000 - \$74,999                         | 18% | 18% | 15%  | 18% |      |
| 4  | \$75,000 - \$99,999                         | 15% | 14% | 17%  | 14% |      |
| 5  | \$100,000+                                  | 26% | 30% | 45%  | 33% |      |
| 6  |                                             |     |     |      |     |      |
| 7  | Employment                                  |     |     | **   |     | n.s. |
| 8  | Employed for pay                            | 51% | 57% | 60%  | 54% |      |
| 9  | Self-employed                               | 7%  | 6%  | 8%   | 7%  |      |
| 10 | Retired                                     | 19% | 18% | 20%  | 17% |      |
| 11 | Not working-disability                      | 7%  | 6%  | 3%   | 7%  |      |
| 12 | Not working-other                           | 17% | 12% | 9%   | 16% |      |
| 13 |                                             |     |     |      |     |      |
| 14 | Urban/Rural                                 |     |     | n.s. |     | n.s. |
| 15 | Urban                                       | 84% | 86% | 88%  | 84% |      |
| 16 | Rural                                       | 16% | 14% | 12%  | 16% |      |
| 17 |                                             |     |     |      |     |      |
| 18 | Resides in State with Sunshine Law          |     |     | n.s. |     | ..   |
| 19 | No                                          | 96% | 96% | ..   | ..  |      |
| 20 | Yes                                         | 4%  | 4%  | ..   | ..  |      |
| 21 |                                             |     |     |      |     |      |
| 22 | Self-rated Health                           |     |     | n.s. |     | n.s. |
| 23 | Excellent                                   | 14% | 13% | 17%  | 14% |      |
| 24 | Good                                        | 61% | 64% | 64%  | 63% |      |
| 25 | Fair                                        | 21% | 20% | 19%  | 21% |      |
| 26 | Poor                                        | 4%  | 3%  | 1%   | 3%  |      |
| 27 |                                             |     |     |      |     |      |
| 28 | Diagnosis of chronic condition <sup>c</sup> |     |     | n.s. |     | n.s. |
| 29 | No                                          | 45% | 46% | 39%  | 45% |      |
| 30 | Yes                                         | 55% | 54% | 61%  | 55% |      |
| 31 |                                             |     |     |      |     |      |
| 32 | Diagnosis of mental health disorder         |     |     | **   |     | n.s. |
| 33 | No                                          | 82% | 98% | 82%  | 83% |      |
| 34 | Yes                                         | 18% | 2%  | 18%  | 17% |      |
| 35 |                                             |     |     |      |     |      |
| 36 | Diagnosis of cancer                         |     |     | *    |     | n.s. |
| 37 | No                                          | 91% | 94% | 92%  | 92% |      |
| 38 | Yes                                         | 9%  | 6%  | 8%   | 8%  |      |
| 39 |                                             |     |     |      |     |      |
| 40 |                                             |     |     |      |     |      |
| 41 |                                             |     |     |      |     |      |
| 42 |                                             |     |     |      |     |      |
| 43 |                                             |     |     |      |     |      |
| 44 |                                             |     |     |      |     |      |
| 45 |                                             |     |     |      |     |      |
| 46 |                                             |     |     |      |     |      |
| 47 |                                             |     |     |      |     |      |

|                                              |     |     |      |     |     |      |
|----------------------------------------------|-----|-----|------|-----|-----|------|
| Diagnosis of stroke or myocardial infarction |     |     | n.s. |     |     | n.s. |
| No                                           | 97% | 95% |      | 98% | 97% |      |
| Yes                                          | 3%  | 5%  |      | 2%  | 3%  |      |
| Any health insurance coverage                |     |     | **   |     |     | n.s. |
| No                                           | 18% | 8%  |      | 8%  | 16% |      |
| Yes                                          | 82% | 92% |      | 92% | 84% |      |

\*\* significant at 0.01 level with Bonferroni correction (0.01/13=0.00077)

\* significant at 0.05 level with Bonferroni correction (0.05/13=0.0038)

n.s. not significant

Percentages may not add up to 100 because of rounding.

Notes:

a. p-values are from chi-squared test of independence with Rao-Scott correction, testing the difference in distribution values between the two groups of respondents. Asterisks indicate significance with Bonferroni correction.

b. Respondent characteristics from Wave 1 (2014) survey.

c. Chronic conditions include acid reflux, asthma, COPD, atrial fibrillation, chronic pain, cystic fibrosis, diabetes, epilepsy, eye disease, gout, heart disease, hepatitis C, hypertension, high cholesterol, HIV, kidney disease, multiple sclerosis, osteoarthritis, osteoporosis, rheumatoid arthritis, sleep disorder.

**Table 2. Changes In Awareness And Knowledge Of Industry Payments After Payments Information Disclosure**

|                                                                                 | Mean or Percentage |       | Change<br>2014-16 | Difference-in-Difference Estimates    |                                                                      | P value <sup>b</sup> |
|---------------------------------------------------------------------------------|--------------------|-------|-------------------|---------------------------------------|----------------------------------------------------------------------|----------------------|
|                                                                                 | 2014               | 2016  |                   | Unadjusted<br>Difference in<br>Change | Regression-Adjusted<br>Difference in<br>Change (95% CI) <sup>a</sup> |                      |
|                                                                                 |                    |       |                   |                                       |                                                                      |                      |
| <b>Awareness and Knowledge of Industry Payments (% Answering Yes)</b>           |                    |       |                   |                                       |                                                                      |                      |
| Aware of industry payments (2014 mean 46.0, sd 49.8)                            |                    |       |                   |                                       |                                                                      |                      |
| Non-Sunshine states                                                             | 45.5%              | 54.1% | 8.7%              | 3.1%                                  | 2.3%                                                                 | 0.4701               |
| Sunshine states                                                                 | 58.0%              | 63.6% | 5.6%              |                                       | (-4.0%,8.6%)                                                         |                      |
| Aware that industry payments info publicly available (2014 mean 10.2, sd 30.2)  |                    |       |                   |                                       |                                                                      |                      |
| Non-Sunshine states                                                             | 9.8%               | 12.9% | 3.2%              | 9.9%                                  | 9.6%                                                                 | 0.0108*              |
| Sunshine states                                                                 | 19.4%              | 12.6% | -6.7%             |                                       | (2.3%,16.9%)                                                         |                      |
| Know whether own doctor has received industry payments (2014 mean 4.4, sd 20.5) |                    |       |                   |                                       |                                                                      |                      |
| Non-Sunshine states                                                             | 4.4%               | 3.1%  | -1.3%             | -0.2%                                 | -0.1%                                                                | 0.9183               |
| Sunshine states                                                                 | 3.8%               | 2.7%  | -1.1%             |                                       | (-2.3%,2.0%)                                                         |                      |

\* significant at 0.05 level

\*\* significant at 0.01 level

Analyses of awareness and knowledge measures based on balanced panel of individuals with non-missing survey items who responded to both 2014 and 2016 surveys: 1,831 non-Sunshine residents and 197 Sunshine residents for awareness of payments; 1,834 non-Sunshine residents and 196 Sunshine residents for awareness that payments information was public and for knowledge of whether own doctor had received payments.

## Notes:

a. Regression models include age, education categories, urban residence, household income categories, employment categories, previous diagnosis of chronic conditions (which include acid reflux, asthma, COPD, atrial fibrillation, chronic pain, cystic fibrosis, diabetes, epilepsy, eye disease, gout, heart disease, hepatitis C, hypertension, high cholesterol, HIV, kidney disease, multiple sclerosis, osteoarthritis, osteoporosis, rheumatoid arthritis, sleep disorder), previous diagnosis of cancer, previous diagnosis of stroke or myocardial infarction, previous diagnosis of mental health disorder, number of visits to the doctor, whether insured, quadratic terms of age and number of visits to account for non-linearities in age and visits, year fixed effects, and individual fixed effects (which absorb gender, race/ethnicity, and other time-invariant individual characteristics). All analyses used Gfk-constructed weights that adjusted for non-coverage, nonresponse, oversampling, and attrition. Standard errors were clustered at the state level.

b. Reported *P* values for regression-adjusted change.



**EFFECT OF THE PUBLIC DISCLOSURE OF INDUSTRY PAYMENTS INFORMATION ON PATIENTS:  
RESULTS FROM A POPULATION-BASED NATURAL EXPERIMENT**

**SUPPLEMENTARY APPENDIX**

- S1. Survey sampling methods
- S2. Sample selection flow diagram
- S3. Characteristics of Wave 2 respondents and non-respondents
- S4. Survey questions
- S5. Full regression results
  - S4a. Models with individual fixed effects
  - S4b. Models without individual fixed effects
- S6. Alternative specifications
  - S5a. Unweighted models
  - S5b. Models without individual fixed effects
  - S5c. Regression-adjusted models that include an indicator for Medicaid expansion
  - S5d. Medicaid expansion states only

1 MANUSCRIPT: PUBLIC DISCLOSURE OF INDUSTRY PAYMENTS  
2  
3

4 **SUPPLEMENTARY APPENDIX S1**  
5 **SURVEY SAMPLING METHODS**  
6  
7

8 *Survey Sampling and Administration*  
9

10 Individuals selected for the initial (Wave 1) survey were recruited from KnowledgePanel® (KP), a  
11 nationally representative household panel assembled by the research firm GfK. KP households are  
12 selected through random digit dialing and address-based sampling so that landline households as well as  
13 cell-phone-only and no-phone households are in a sampling frame covering 97% of US households. KP  
14 households agree to participate in occasional surveys and, in return for their participation, accumulate  
15 points that they can redeem for cash, merchandise, and other items of monetary value (average  
16 accumulation valued at \$4-\$6 per month). Households without Internet access are provided a web-  
17 enabled computer and free Internet service for the duration of their participation in the panel. Detailed  
18 information about KP sampling methodology, incentive structures, informed consent, and other human  
19 subjects issues are documented in Dennis and Thomas (2013).<sup>1</sup>  
20  
21

22 For Wave 1, individuals were sampled from KP households in all 50 states, excluding DC, to  
23 constitute a nationally representative sample, with oversampling in Massachusetts and Minnesota to  
24 enable us to detect smaller effects in these two states that had previously passed Sunshine laws. We did  
25 not oversample Vermont, the third Sunshine state, because even an oversample of this relatively small  
26 population would have not have generated sufficient power to detect an effect in that state.  
27  
28

29 The Wave 1 sample consisted of 3,542 respondents who completed the initial survey in 2014  
30 (Wave 1 completion 45.9%). More details on administration of the Wave 1 survey may be found in  
31 Pham-Kanter et al (2017).<sup>2</sup>  
32

33 For Wave 2, GfK identified 2,711 (77%) respondents from Wave 1 respondents who were still in  
34 the panel in 2016 and who were available for re-contact. All of these individuals were asked to complete  
35 the Wave 2 survey.  
36  
37

38 *Survey Field Period*  
39

40 The first survey was fielded online September 26-October 3, 2014, with almost all surveys (94%)  
41 completed by the Open Payments data release date of September 30. The Wave 2 survey was fielded  
42 online September 16-October 2, 2016, two years after the initial survey.  
43

44 Individuals selected for the surveys received a notification email with a link to the survey. After  
45 three days, individuals who had not responded to the survey were sent an email reminder. For Wave 2,  
46 which had a slightly longer field period than Wave 1, nonrespondents also received an automated email  
47 reminder 11 days after the initial survey contact.  
48  
49

50 *Completion Rate*  
51

52 Of those who were re-contacted for Wave 2, 80% (n=2,180) completed the survey, resulting in  
53 an overall completion rate of 62%. The sample selection flow diagram is shown in Appendix S2.  
54  
55  
56  
57  
58  
59  
60

## MANUSCRIPT: PUBLIC DISCLOSURE OF INDUSTRY PAYMENTS

Completion rates varied by state and ranged from 40% to 81.8%. Average completion rates for Sunshine and non-Sunshine states did not differ significantly from each other (61.1% and 66.5%, respectively,  $p=0.062$ ).

*Survey Weights*

Our analysis uses survey weights provided by GfK that account for non-coverage, oversampling, and nonresponse/attrition. These GfK weights use, as a benchmark, distributions derived from the 2014 March Supplement Current Population Survey (CPS) so the survey sample matches the US adult population on key demographic dimensions (gender, age, race/Hispanic ethnicity, education, Census region, household income, homeownership status, metropolitan residence, Internet access). Details on the construction of survey weights are documented in Dennis and Thomas (2013).<sup>2</sup>

1  
2  
3  
4  
5  
6  
7  
8  
9  
10  
11  
12  
13  
14  
15  
16  
17  
18  
19  
20  
21  
22  
23  
24  
25  
26  
27  
28  
29  
30  
31  
32  
33  
34  
35  
36  
37  
38  
39  
40  
41  
42  
43  
44  
45  
46  
47  
48  
49  
50  
51  
52  
53  
54  
55  
56  
57  
58  
59  
60  
MANUSCRIPT: PUBLIC DISCLOSURE OF INDUSTRY PAYMENTS**SUPPLEMENTARY APPENDIX S2**  
**SAMPLE SELECTION FLOW DIAGRAM**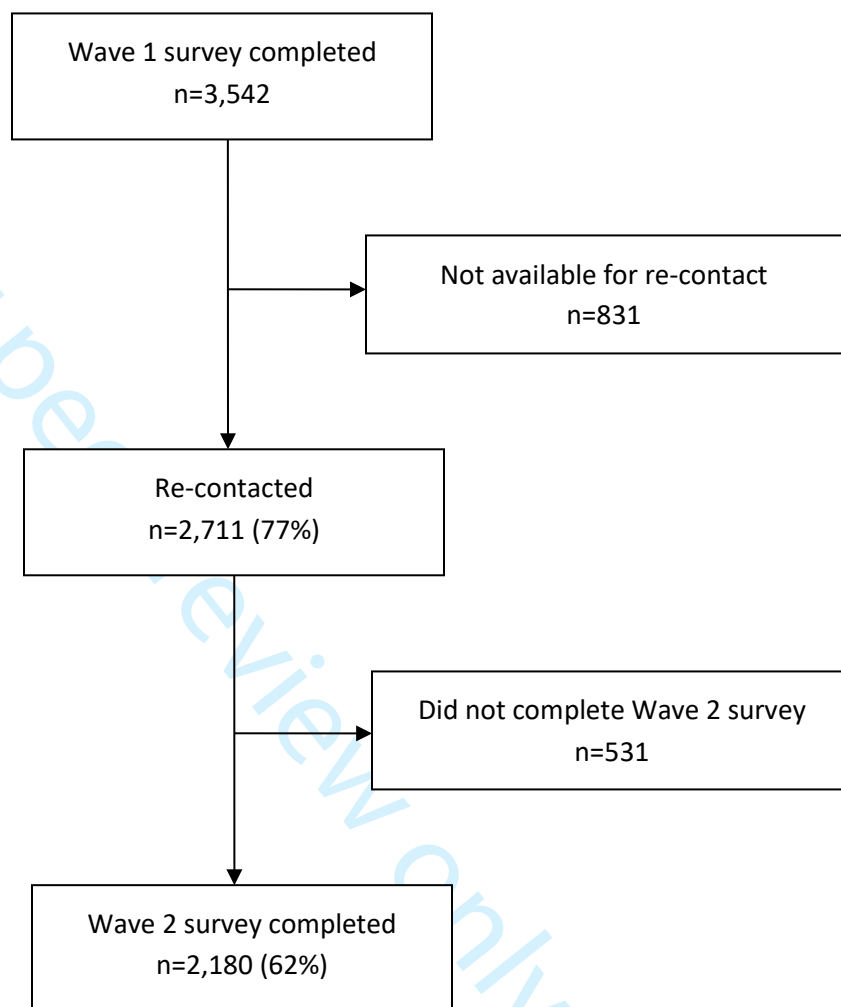

1 MANUSCRIPT: PUBLIC DISCLOSURE OF INDUSTRY PAYMENTS

2  
3  
4  
5  
6  
7  
8  
9  
10  
11  
12  
13  
14  
15  
16  
17  
18  
19  
20  
21  
22  
23  
24  
25  
26  
27  
28  
29  
30  
31  
32  
33  
34  
35  
36  
37  
38  
39  
40  
41  
42  
43  
44  
45  
46  
47  
48  
49  
50  
51  
52  
53  
54  
55  
56  
57  
58  
59  
60

**SUPPLEMENTARY APPENDIX S3**

**CHARACTERISTICS OF WAVE 2 RESPONDENTS AND NON-RESPONDENTS**

For peer review only

**Table S3. 2014 Characteristics of Wave 2 Respondents and Non-Respondents**

|                                              | Weighted Distribution %      |                                            | Statistical Significance (Bonferroni correction) <sup>a</sup> |
|----------------------------------------------|------------------------------|--------------------------------------------|---------------------------------------------------------------|
|                                              | Wave 2 respondents (n=2,180) | Not contacted or did not respond (n=1,362) |                                                               |
| Gender                                       |                              |                                            | n.s.                                                          |
| Female                                       | 49%                          | 56%                                        |                                                               |
| Male                                         | 51%                          | 44%                                        |                                                               |
| Race/Ethnicity                               |                              |                                            | **                                                            |
| Caucasian                                    | 70%                          | 60%                                        |                                                               |
| Hispanic                                     | 10%                          | 14%                                        |                                                               |
| Black, Non-Hispanic                          | 13%                          | 19%                                        |                                                               |
| Other                                        | 8%                           | 8%                                         |                                                               |
| Age                                          |                              |                                            | **                                                            |
| <=20                                         | 4%                           | 5%                                         |                                                               |
| 21-30                                        | 17%                          | 23%                                        |                                                               |
| 31-40                                        | 15%                          | 16%                                        |                                                               |
| 41-50                                        | 15%                          | 16%                                        |                                                               |
| 51-60                                        | 22%                          | 18%                                        |                                                               |
| 61+                                          | 27%                          | 22%                                        |                                                               |
| Education                                    |                              |                                            | **                                                            |
| Less than high school                        | 10%                          | 15%                                        |                                                               |
| High school graduate                         | 31%                          | 27%                                        |                                                               |
| Some college                                 | 28%                          | 30%                                        |                                                               |
| College graduate                             | 31%                          | 27%                                        |                                                               |
| Household Income                             |                              |                                            | n.s.                                                          |
| \$0 - \$24,999                               | 16%                          | 21%                                        |                                                               |
| \$25,000 - \$49,999                          | 22%                          | 24%                                        |                                                               |
| \$50,000 - \$74,999                          | 19%                          | 18%                                        |                                                               |
| \$75,000 - \$99,999                          | 16%                          | 15%                                        |                                                               |
| \$100,000+                                   | 28%                          | 23%                                        |                                                               |
| Employment                                   |                              |                                            | **                                                            |
| Employed for pay                             | 52%                          | 48%                                        |                                                               |
| Self-employed                                | 6%                           | 7%                                         |                                                               |
| Retired                                      | 21%                          | 16%                                        |                                                               |
| Not working - disability                     | 7%                           | 8%                                         |                                                               |
| Not working - other                          | 14%                          | 21%                                        |                                                               |
| Urban/Rural                                  |                              |                                            | n.s.                                                          |
| Urban                                        | 16%                          | 16%                                        |                                                               |
| Rural                                        | 84%                          | 84%                                        |                                                               |
| Resides in State with Sunshine Law           |                              |                                            | n.s.                                                          |
| No                                           | 96%                          | 96%                                        |                                                               |
| Yes                                          | 4%                           | 4%                                         |                                                               |
| Self-rated Health                            |                              |                                            | n.s.                                                          |
| Excellent                                    | 13%                          | 15%                                        |                                                               |
| Good                                         | 63%                          | 58%                                        |                                                               |
| Fair                                         | 21%                          | 22%                                        |                                                               |
| Poor                                         | 3%                           | 5%                                         |                                                               |
| Diagnosis of chronic condition <sup>b</sup>  |                              |                                            | n.s.                                                          |
| No                                           | 42%                          | 49%                                        |                                                               |
| Yes                                          | 58%                          | 51%                                        |                                                               |
| Diagnosis of mental health disorder          |                              |                                            | n.s.                                                          |
| No                                           | 83%                          | 80%                                        |                                                               |
| Yes                                          | 17%                          | 20%                                        |                                                               |
| Diagnosis of cancer                          |                              |                                            | n.s.                                                          |
| No                                           | 91%                          | 92%                                        |                                                               |
| Yes                                          | 9%                           | 8%                                         |                                                               |
| Diagnosis of stroke or myocardial infarction |                              |                                            | n.s.                                                          |
| No                                           | 97%                          | 96%                                        |                                                               |
| Yes                                          | 3%                           | 4%                                         |                                                               |
| Any health insurance coverage                |                              |                                            | **                                                            |
| No                                           | 16%                          | 21%                                        |                                                               |
| Yes                                          | 84%                          | 79%                                        |                                                               |

\*\* significant at 0.01 level with Bonferroni correction (0.01/13=0.00077)

\* significant at 0.05 level with Bonferroni correction (0.05/13=0.0038)

n.s. not significant

Percentages may not add up to 100 because of rounding.

Notes:

a. P-values are from chi-squared test of independence with Rao-Scott correction, testing the difference in distribution values between Wave 2 respondents and nonrespondents using base weights. Asterisks indicate significance with Bonferroni correction.

b. Chronic conditions include acid reflux, asthma, COPD, atrial fibrillation, chronic pain, cystic fibrosis, diabetes, epilepsy, eye disease, gout, heart disease, hepatitis C, hypertension, high cholesterol, HIV, kidney disease, multiple sclerosis, osteoarthritis, osteoporosis, rheumatoid arthritis, sleep disorder.

1 MANUSCRIPT: PUBLIC DISCLOSURE OF INDUSTRY PAYMENTS  
2  
3

4 **SUPPLEMENTARY APPENDIX S4**  
5 **SURVEY QUESTIONS**  
6  
7

8 **Awareness and Knowledge of Industry Payments**  
9

- 10  
11 1. Some doctors receive payments from pharmaceutical (drug) and medical device companies in the  
12 form of small gifts such as pens, mugs, or books; reimbursement for travel and conference  
13 presentations; or financial compensation for consulting services. Have you heard about these  
14 payments before now?  
15

16 *Response choices:* Yes; No; Don't know  
17

- 18  
19 2. A variety of sources recently began posting information about payments made by pharmaceutical  
20 and medical device companies to doctors. Were you aware that this information is available?  
21

22 *Response choices:* Yes, I was aware; No, I was not aware; Not sure  
23

- 24 3. Do you know whether the doctor you've seen most frequently in the past 12 months has received  
25 any payments from a pharmaceutical or medical device firm?  
26

27 *Response choices:* Yes, I know my doctor has received payments; Yes, I know my doctor has not  
28 received any payments; No, I do not know whether my doctor has received any payments; Not  
29 sure  
30  
31  
32  
33  
34  
35  
36  
37  
38  
39  
40  
41  
42  
43  
44  
45  
46  
47  
48  
49  
50  
51  
52  
53  
54  
55  
56  
57  
58  
59  
60

1 MANUSCRIPT: PUBLIC DISCLOSURE OF INDUSTRY PAYMENTS  
2  
3

4 **SUPPLEMENTARY APPENDIX S5**  
5 **FULL REGRESSION RESULTS**  
6  
7

8  
9  
10 S5a. Models with individual fixed effects

11 S5b. Models without individual fixed effects  
12  
13  
14  
15  
16  
17  
18  
19  
20  
21  
22  
23  
24  
25  
26  
27  
28  
29  
30  
31  
32  
33  
34  
35  
36  
37  
38  
39  
40  
41  
42  
43  
44  
45  
46  
47  
48  
49  
50  
51  
52  
53  
54  
55  
56  
57  
58  
59  
60

For peer review only



**Table S5a. Full Regression Results, Models With Individual Fixed Effects**

|                                             | Dependent variable    |                          |                                  |
|---------------------------------------------|-----------------------|--------------------------|----------------------------------|
|                                             | Awareness of payments | Awareness of public info | Knowledge of own doctor payments |
| Open Payments disclosure                    | 0.0227<br>(0.0312)    | 0.0961<br>(0.0363)       | -0.0011<br>(0.0107)              |
| Age                                         | -0.0347<br>(0.0738)   | -0.0672<br>(0.0625)      | -0.0293<br>(0.0297)              |
| Age squared                                 | -0.0004<br>(0.0003)   | -0.0004<br>(0.0002)      | 0.0001<br>(0.0001)               |
| Less than high school education             | ..                    | ..                       | ..                               |
| High school graduate                        | -0.0523<br>(0.1136)   | -0.1071<br>(0.0667)      | -0.0677<br>(0.0574)              |
| Some college                                | 0.0784<br>(0.1410)    | -0.0230<br>(0.0880)      | -0.0408<br>(0.0571)              |
| College graduate                            | 0.1760<br>(0.1572)    | -0.0341<br>(0.1636)      | -0.0953<br>(0.0714)              |
| Urban residence                             | -0.1190<br>(0.0991)   | 0.0253<br>(0.0526)       | 0.0239<br>(0.0175)               |
| Household income \$0-\$24,999               | ..                    | ..                       | ..                               |
| Household income \$25,000-\$49,999          | 0.0411<br>(0.0526)    | 0.0405<br>(0.0345)       | 0.0352<br>(0.0267)               |
| Household income \$50,000-\$74,999          | 0.0194<br>(0.0918)    | -0.0098<br>(0.0383)      | 0.0147<br>(0.0268)               |
| Household income \$75,000-\$99,999          | 0.0432<br>(0.1088)    | -0.0177<br>(0.0399)      | 0.0176<br>(0.0391)               |
| Household income \$100,000+                 | 0.0608<br>(0.0857)    | 0.0197<br>(0.0529)       | 0.0304<br>(0.0274)               |
| Not employed                                | ..                    | ..                       | ..                               |
| Self-employed                               | 0.0066<br>(0.1079)    | -0.1170<br>(0.0990)      | 0.0123<br>(0.0502)               |
| Employed for pay                            | -0.0209<br>(0.0725)   | -0.0477<br>(0.0594)      | -0.0254<br>(0.0426)              |
| Retired                                     | -0.0492<br>(0.0816)   | 0.0243<br>(0.0767)       | 0.0111<br>(0.0489)               |
| Diagnosis of chronic condition <sup>a</sup> | 0.0407<br>(0.0486)    | 0.0156<br>(0.0408)       | -0.0011<br>(0.0165)              |
| Diagnosis of cancer                         | -0.0979<br>(0.0802)   | -0.0044<br>(0.0440)      | 0.0126<br>(0.0222)               |
| Diagnosis of MI or stroke                   | -0.0346<br>(0.0888)   | 0.0144<br>(0.0682)       | -0.0190<br>(0.0477)              |
| Diagnosis of mental health disorder         | 0.0506<br>(0.0532)    | -0.0066<br>(0.0321)      | -0.0107<br>(0.0274)              |
| Number of office visits                     | 0.0025<br>(0.0038)    | -0.0014<br>(0.0036)      | 0.0002<br>(0.0023)               |
| Number of office visits squared             | 0.0000                | 0.0000                   | 0.0000                           |

|    |                                  |              |             |              |
|----|----------------------------------|--------------|-------------|--------------|
| 1  |                                  |              |             |              |
| 2  |                                  | (0.0001)     | (0.0001)    | (0.0000)     |
| 3  | Health insurance coverage        | 0.0402       | 0.0341      | 0.0119       |
| 4  |                                  | (0.0605)     | (0.0554)    | (0.0113)     |
| 5  |                                  |              |             |              |
| 6  | Year fixed effects               | YES          | YES         | YES          |
| 7  | Individual fixed effects         | YES          | YES         | YES          |
| 8  |                                  |              |             |              |
| 9  | F-statistic (degrees of freedom) | 3.64 (22,49) | 2.7 (22,49) | 2.46 (22,49) |
| 10 | R <sup>2</sup>                   | 0.7602       | 0.6452      | 0.6709       |
| 11 |                                  |              |             |              |
| 12 |                                  |              |             |              |
| 13 | Sample Size                      | 2,028        | 2,030       | 2,030        |

Standard errors clustered at the state level, reported in parentheses.

Notes:

a. Chronic conditions include acid reflux, asthma, COPD, atrial fibrillation, chronic pain, cystic fibrosis, diabetes, epilepsy, eye disease, gout, heart disease, hepatitis C, hypertension, high cholesterol, HIV, kidney disease, multiple sclerosis, osteoarthritis, osteoporosis, rheumatoid arthritis, sleep disorder.

**Table S5b. Full Regression Results, Models Without Individual Fixed Effects**

|                                      | Dependent variable    |                          |                                  |
|--------------------------------------|-----------------------|--------------------------|----------------------------------|
|                                      | Awareness of payments | Awareness of public info | Knowledge of own doctor payments |
| Open Payments disclosure             | 0.0234<br>(0.0229)    | 0.1018<br>(0.0244)       | 0.0004<br>(0.0070)               |
| Non-Sunshine state resident          | -0.0223<br>(0.0182)   | -0.0824<br>(0.0126)      | -0.0025<br>(0.0051)              |
| Post-Open Payments year <sup>a</sup> | 0.0608<br>(0.0149)    | -0.0738<br>(0.0230)      | -0.0125<br>(0.0039)              |
| Age                                  | 0.0066<br>(0.0030)    | 0.0009<br>(0.0022)       | -0.0024<br>(0.0014)              |
| Age squared                          | -0.0001<br>(0.0000)   | 0.0000<br>(0.0000)       | 0.0000<br>(0.0000)               |
| Less than high school education      | ..                    | ..                       | ..                               |
| High school graduate                 | 0.0828<br>(0.0254)    | 0.0170<br>(0.0195)       | -0.0179<br>(0.0216)              |
| Some college                         | 0.1971<br>(0.0265)    | 0.0430<br>(0.0178)       | -0.0149<br>(0.0208)              |
| College graduate                     | 0.2933<br>(0.0363)    | 0.0919<br>(0.0197)       | -0.0067<br>(0.0217)              |
| Caucasian                            | ..                    | ..                       | ..                               |
| Black, non-Hispanic                  | -0.1722<br>(0.0274)   | -0.0364<br>(0.0120)      | 0.0029<br>(0.0167)               |
| Hispanic                             | -0.1003<br>(0.0372)   | 0.0041<br>(0.0187)       | 0.0031<br>(0.0114)               |
| Other/Multi                          | -0.0402<br>(0.0426)   | 0.0334<br>(0.0307)       | 0.0141<br>(0.0253)               |
| Female                               | -0.0212<br>(0.0237)   | -0.0358<br>(0.0154)      | 0.0253<br>(0.0071)               |
| Urban residence                      | 0.0059<br>(0.0362)    | -0.0027<br>(0.0210)      | 0.0170<br>(0.0079)               |
| Household income \$0-\$24,999        | ..                    | ..                       | ..                               |
| Household income \$25,000-\$49,999   | 0.0985<br>(0.0250)    | 0.0161<br>(0.0168)       | -0.0045<br>(0.0172)              |
| Household income \$50,000-\$74,999   | 0.1446<br>(0.0249)    | 0.0086<br>(0.0185)       | 0.0173<br>(0.0161)               |
| Household income \$75,000-\$99,999   | 0.1619<br>(0.0372)    | 0.0077<br>(0.0172)       | -0.0044<br>(0.0176)              |
| Household income \$100,000+          | 0.1898<br>(0.0261)    | 0.0251<br>(0.0171)       | -0.0135<br>(0.0153)              |
| Not employed                         | ..                    | ..                       | ..                               |
| Self-employed                        | 0.1070<br>(0.0385)    | -0.0080<br>(0.0289)      | -0.0158<br>(0.0127)              |
| Employed for pay                     | 0.0478<br>(0.0211)    | 0.0063<br>(0.0136)       | -0.0171<br>(0.0094)              |
| Retired                              | 0.0938                | 0.0194                   | -0.0079                          |

|    |                                             |                |               |               |
|----|---------------------------------------------|----------------|---------------|---------------|
| 1  |                                             |                |               |               |
| 2  |                                             | (0.0283)       | (0.0216)      | (0.0087)      |
| 3  | Diagnosis of chronic condition <sup>b</sup> | 0.0842         | 0.0069        | 0.0033        |
| 4  |                                             | (0.0273)       | (0.0180)      | (0.0140)      |
| 5  | Diagnosis of cancer                         | 0.0155         | -0.0202       | 0.0185        |
| 6  |                                             | (0.0335)       | (0.0198)      | (0.0152)      |
| 7  | Diagnosis of MI or stroke                   | 0.0344         | 0.0781        | 0.0261        |
| 8  |                                             | (0.0447)       | (0.0487)      | (0.0190)      |
| 9  | Diagnosis of mental health disorder         | 0.0484         | -0.0004       | -0.0043       |
| 10 |                                             | (0.0335)       | (0.0205)      | (0.0106)      |
| 11 | Number of office visits                     | 0.0098         | 0.0022        | 0.0019        |
| 12 |                                             | (0.0033)       | (0.0023)      | (0.0011)      |
| 13 | Number of office visits squared             | -0.0001        | 0.0000        | 0.0000        |
| 14 |                                             | (0.0000)       | (0.0000)      | (0.0000)      |
| 15 | Health insurance coverage                   | 0.0193         | -0.0068       | -0.0016       |
| 16 |                                             | (0.0278)       | (0.0194)      | (0.0155)      |
| 17 |                                             |                |               |               |
| 18 |                                             |                |               |               |
| 19 | Year fixed effects <sup>a</sup>             | YES            | YES           | YES           |
| 20 | Individual fixed effects                    | NO             | NO            | NO            |
| 21 |                                             |                |               |               |
| 22 | F-statistic (degrees of freedom)            | 101.02 (27,49) | 20.87 (27,49) | 15.25 (27,49) |
| 23 | R <sup>2</sup>                              | 0.1399         | 0.0266        | 0.0164        |
| 24 |                                             |                |               |               |
| 25 | Sample Size                                 | 2,028          | 2,030         | 2,030         |

Standard errors clustered at the state level, reported in parentheses.

Notes:

a. Coefficient on year fixed effect reported as coefficient on Post-Open Payments year.

a. Chronic conditions include acid reflux, asthma, COPD, atrial fibrillation, chronic pain, cystic fibrosis, diabetes, epilepsy, eye disease, gout, heart disease, hepatitis C, hypertension, high cholesterol, HIV, kidney disease, multiple sclerosis, osteoarthritis, osteoporosis, rheumatoid arthritis, sleep disorder.

1 MANUSCRIPT: PUBLIC DISCLOSURE OF INDUSTRY PAYMENTS  
2  
3

4 **SUPPLEMENTARY APPENDIX S6**  
5 **ALTERNATIVE SPECIFICATIONS**  
6  
7

- 8  
9  
10 S6a. Unweighted models  
11 S6b. Regression-adjusted models without individual fixed effects  
12 S6c. Regression-adjusted models that include an indicator for Medicaid expansion  
13  
14 S6d. Medicaid expansion states only  
15  
16  
17  
18  
19  
20  
21  
22  
23  
24  
25  
26  
27  
28  
29  
30  
31  
32  
33  
34  
35  
36  
37  
38  
39  
40  
41  
42  
43  
44  
45  
46  
47  
48  
49  
50  
51  
52  
53  
54  
55  
56  
57  
58  
59  
60

For peer review only

**Table S6a. Alternative Specification: Unweighted Models**

|                                                                       | Mean or Percentage |       | Change<br>2014-16 | Difference-in-Difference Estimates    |                                                                      | P value <sup>b</sup> |
|-----------------------------------------------------------------------|--------------------|-------|-------------------|---------------------------------------|----------------------------------------------------------------------|----------------------|
|                                                                       | 2014               | 2016  |                   | Unadjusted<br>Difference in<br>Change | Regression-Adjusted<br>Difference in<br>Change (95% CI) <sup>a</sup> |                      |
|                                                                       |                    |       |                   |                                       |                                                                      |                      |
| <b>Awareness and Knowledge of Industry Payments (% Answering Yes)</b> |                    |       |                   |                                       |                                                                      |                      |
| Aware of industry payments                                            |                    |       |                   |                                       |                                                                      |                      |
| Non-Sunshine states                                                   | 49.7%              | 58.1% | 8.4%              | 2.8%                                  | 2.3% (-3.2%,7.7%)                                                    | 0.4031               |
| Sunshine states                                                       | 58.9%              | 64.5% | 5.6%              |                                       |                                                                      |                      |
| Aware that industry payments info publicly available                  |                    |       |                   |                                       |                                                                      |                      |
| Non-Sunshine states                                                   | 10.9%              | 13.0% | 2.1%              | 11.3%                                 | 11.3% (8.6%,13.9%)                                                   | <0.0001**            |
| Sunshine states                                                       | 20.9%              | 11.7% | -9.2%             |                                       |                                                                      |                      |
| Know whether own doctor has received industry payments                |                    |       |                   |                                       |                                                                      |                      |
| Non-Sunshine states                                                   | 4.4%               | 2.9%  | -1.5%             | 0.0%                                  | 0.0% (-2.0%,2.0%)                                                    | 0.9828               |
| Sunshine states                                                       | 4.1%               | 2.5%  | -1.5%             |                                       |                                                                      |                      |

Analyses of awareness and knowledge measures based on balanced panel of individuals with non-missing survey items who responded to both 2014 and 2016 surveys: 1,831 non-Sunshine residents and 197 Sunshine residents for awareness of payments; 1,834 non-Sunshine residents and 196 Sunshine residents for awareness that payments information was public and for knowledge of whether own doctor had received payments.

Notes:

a. Regression models include age, education categories, urban residence, household income categories, employment categories, previous diagnosis of chronic conditions (which include acid reflux, asthma, COPD, atrial fibrillation, chronic pain, cystic fibrosis, diabetes, epilepsy, eye disease, gout, heart disease, hepatitis C, hypertension, high cholesterol, HIV, kidney disease, multiple sclerosis, osteoarthritis, osteoporosis, rheumatoid arthritis, sleep disorder), previous diagnosis of cancer, previous diagnosis of stroke or myocardial infarction, previous diagnosis of mental health disorder, number of visits to the doctor, whether insured, quadratic terms of age and number of visits to account for non-linearities in age and visits, and year and individual fixed effects. All analyses used GfK-constructed weights that adjusted for non-coverage, nonresponse, oversampling, and attrition. Standard errors were clustered at the state level.

b. Reported P values for regression-adjusted change.

**Table S6b. Alternative Specification: Regression-Adjusted Models Without Individual Fixed Effects**

|                                                                       | Mean or Percentage |       | Change<br>2014-16 | Difference-in-Difference Estimates    |                                                                      | P value <sup>b</sup> |
|-----------------------------------------------------------------------|--------------------|-------|-------------------|---------------------------------------|----------------------------------------------------------------------|----------------------|
|                                                                       | 2014               | 2016  |                   | Unadjusted<br>Difference in<br>Change | Regression-Adjusted<br>Difference in<br>Change (95% CI) <sup>a</sup> |                      |
|                                                                       |                    |       |                   |                                       |                                                                      |                      |
| <b>Awareness and Knowledge of Industry Payments (% Answering Yes)</b> |                    |       |                   |                                       |                                                                      |                      |
| Aware of industry payments                                            |                    |       |                   |                                       |                                                                      |                      |
| Non-Sunshine states                                                   | 45.5%              | 54.1% | 8.7%              | 3.1%                                  | 2.3% (-2.3%,6.9%)                                                    | 0.3128               |
| Sunshine states                                                       | 58.0%              | 63.6% | 5.6%              |                                       |                                                                      |                      |
| Aware that industry payments info publicly available                  |                    |       |                   |                                       |                                                                      |                      |
| Non-Sunshine states                                                   | 9.8%               | 12.9% | 3.2%              | 9.9%                                  | 10.2% (5.3%,15.1%)                                                   | 0.0001**             |
| Sunshine states                                                       | 19.4%              | 12.6% | -6.7%             |                                       |                                                                      |                      |
| Know whether own doctor has received industry payments                |                    |       |                   |                                       |                                                                      |                      |
| Non-Sunshine states                                                   | 4.4%               | 3.1%  | -1.3%             | -0.2%                                 | 0.0% (-1.4%,1.5%)                                                    | 0.9583               |
| Sunshine states                                                       | 3.8%               | 2.7%  | -1.1%             |                                       |                                                                      |                      |

Analyses of awareness and knowledge measures based on balanced panel of individuals with non-missing survey items who responded to both 2014 and 2016 surveys: 1,831 non-Sunshine residents and 197 Sunshine residents for awareness of payments; 1,834 non-Sunshine residents and 196 Sunshine residents for awareness that payments information was public and for knowledge of whether own doctor had received payments.

Notes:

a. Regression models include age, education categories, urban residence, household income categories, employment categories, previous diagnosis of chronic conditions (which include acid reflux, asthma, COPD, atrial fibrillation, chronic pain, cystic fibrosis, diabetes, epilepsy, eye disease, gout, heart disease, hepatitis C, hypertension, high cholesterol, HIV, kidney disease, multiple sclerosis, osteoarthritis, osteoporosis, rheumatoid arthritis, sleep disorder), previous diagnosis of cancer, previous diagnosis of stroke or myocardial infarction, previous diagnosis of mental health disorder, number of visits to the doctor, whether insured, quadratic terms of age and number of visits to account for non-linearities in age and visits, indicator for non-Sunshine state, indicator for post-Open Payments year (2016), interaction between non-Sunshine state indicator and post-Open Payments year indicator, gender, and race/ethnicity categories. All analyses used Gfk-constructed weights that adjusted for non-coverage, nonresponse, oversampling, and attrition. Standard errors were clustered at the state level.

b. Reported P values for regression-adjusted change.

**Table S6c. Alternative Specification: Regression-Adjusted Models that Include an Indicator for Medicaid Expansion**

|                                                        | Mean or Percentage                                                    |       | Change<br>2014-16 | Difference-in-Difference Estimates    |                                                                      | P value <sup>b</sup> |
|--------------------------------------------------------|-----------------------------------------------------------------------|-------|-------------------|---------------------------------------|----------------------------------------------------------------------|----------------------|
|                                                        | 2014                                                                  | 2016  |                   | Unadjusted<br>Difference in<br>Change | Regression-Adjusted<br>Difference in<br>Change (95% CI) <sup>a</sup> |                      |
|                                                        | <b>Awareness and Knowledge of Industry Payments (% Answering Yes)</b> |       |                   |                                       |                                                                      |                      |
| Aware of industry payments                             |                                                                       |       |                   |                                       |                                                                      |                      |
| Non-Sunshine states                                    | 45.5%                                                                 | 54.1% | 8.7%              | 3.1%                                  | 1.6% (-4.6%,7.7%)                                                    | 0.6127               |
| Sunshine states                                        | 58.0%                                                                 | 63.6% | 5.6%              |                                       |                                                                      |                      |
| Aware that industry payments info publicly available   |                                                                       |       |                   |                                       |                                                                      |                      |
| Non-Sunshine states                                    | 9.8%                                                                  | 12.9% | 3.2%              | 9.9%                                  | 8.8% (1.4%,16.1%)                                                    | 0.0203*              |
| Sunshine states                                        | 19.4%                                                                 | 12.6% | -6.7%             |                                       |                                                                      |                      |
| Know whether own doctor has received industry payments |                                                                       |       |                   |                                       |                                                                      |                      |
| Non-Sunshine states                                    | 4.4%                                                                  | 3.1%  | -1.3%             | -0.2%                                 | -0.1% (-2.3%,2.1%)                                                   | 0.9206               |
| Sunshine states                                        | 3.8%                                                                  | 2.7%  | -1.1%             |                                       |                                                                      |                      |

Analyses of awareness and knowledge measures based on balanced panel of individuals with non-missing survey items who responded to both 2014 and 2016 surveys: 1,831 non-Sunshine residents and 197 Sunshine residents for awareness of payments; 1,834 non-Sunshine residents and 196 Sunshine residents for awareness that payments information was public and for knowledge of whether own doctor had received payments.

Notes:

a. Regression models include age, education categories, urban residence, household income categories, employment categories, previous diagnosis of chronic conditions (which include acid reflux, asthma, COPD, atrial fibrillation, chronic pain, cystic fibrosis, diabetes, epilepsy, eye disease, gout, heart disease, hepatitis C, hypertension, high cholesterol, HIV, kidney disease, multiple sclerosis, osteoarthritis, osteoporosis, rheumatoid arthritis, sleep disorder), previous diagnosis of cancer, previous diagnosis of stroke or myocardial infarction, previous diagnosis of mental health disorder, number of visits to the doctor, whether insured, quadratic terms of age and number of visits to account for non-linearities in age and visits, and year and individual fixed effects. All analyses used GfK-constructed weights that adjusted for non-coverage, nonresponse, oversampling, and attrition. Standard errors were clustered at the state level.

b. Reported P values for regression-adjusted change.



**Table S6d. Alternative Specification: Medicaid Expansion States Only**

|                                                                       | Mean or Percentage |       | Change<br>2014-16 | Difference-in-Difference Estimates    |                                                                      | P value <sup>b</sup> |
|-----------------------------------------------------------------------|--------------------|-------|-------------------|---------------------------------------|----------------------------------------------------------------------|----------------------|
|                                                                       | 2014               | 2016  |                   | Unadjusted<br>Difference in<br>Change | Regression-Adjusted<br>Difference in<br>Change (95% CI) <sup>a</sup> |                      |
|                                                                       |                    |       |                   |                                       |                                                                      |                      |
| <b>Awareness and Knowledge of Industry Payments (% Answering Yes)</b> |                    |       |                   |                                       |                                                                      |                      |
| Aware of industry payments                                            |                    |       |                   |                                       |                                                                      |                      |
| Non-Sunshine states                                                   | 44.5%              | 53.2% | 8.7%              | 3.1%                                  | 2.1% (-4.8%,8.9%)                                                    | 0.5414               |
| Sunshine states                                                       | 58.0%              | 63.6% | 5.6%              |                                       |                                                                      |                      |
| Aware that industry payments info publicly available                  |                    |       |                   |                                       |                                                                      |                      |
| Non-Sunshine states                                                   | 9.3%               | 14.5% | 5.3%              | 12.0%                                 | 11.6% (3.8%,19.3%)                                                   | 0.0045**             |
| Sunshine states                                                       | 19.4%              | 12.6% | -6.7%             |                                       |                                                                      |                      |
| Know whether own doctor has received industry payments                |                    |       |                   |                                       |                                                                      |                      |
| Non-Sunshine states                                                   | 4.0%               | 2.9%  | -1.1%             | 0.0%                                  | 0.2% (-2.0%,2.4%)                                                    | 0.8694               |
| Sunshine states                                                       | 3.8%               | 2.7%  | -1.1%             |                                       |                                                                      |                      |

Analyses of awareness and knowledge measures based on balanced panel of individuals with non-missing survey items who responded to both 2014 and 2016 surveys and resided in Medicaid expansion states: 1,101 non-Sunshine residents and 197 Sunshine residents for awareness of payments; 1,093 non-Sunshine residents and 196 Sunshine residents for awareness that payments information was public; 1,094 non-Sunshine residents and 197 Sunshine residents for knowledge of whether own doctor had received payments.

Notes:

a. Regression models include age, education categories, urban residence, household income categories, employment categories, previous diagnosis of chronic conditions (which include acid reflux, asthma, COPD, atrial fibrillation, chronic pain, cystic fibrosis, diabetes, epilepsy, eye disease, gout, heart disease, hepatitis C, hypertension, high cholesterol, HIV, kidney disease, multiple sclerosis, osteoarthritis, osteoporosis, rheumatoid arthritis, sleep disorder), previous diagnosis of cancer, previous diagnosis of stroke or myocardial infarction, previous diagnosis of mental health disorder, number of visits to the doctor, whether insured, quadratic terms of age and number of visits to account for non-linearities in age and visits, and year and individual fixed effects. All analyses used GfK-constructed weights that adjusted for non-coverage, nonresponse, oversampling, and attrition. Standard errors were clustered at the state level.

b. Reported P values for regression-adjusted change.

1  
2  
3  
4  
5  
6  
7  
8  
9  
10  
11  
12  
13  
14  
15  
16  
17  
18  
19  
20  
21  
22  
23  
24  
25  
26  
27  
28  
29  
30  
31  
32  
33  
34  
35  
36  
37  
38  
39  
40  
41  
42  
43  
44  
45  
46  
47  
48  
49  
50  
51  
52  
53  
54  
55  
56  
57  
58  
59  
60

MANUSCRIPT: PUBLIC DISCLOSURE OF INDUSTRY PAYMENTS

#### REFERENCES FOR SUPPLEMENTARY APPENDIX

1. Dennis JM, Thomas RK. Documentation for human subjects review committees: GfK company information, past external review, confidentiality, and privacy protections for panelists. <http://www.knowledgenetworks.com/ganp/irbsupport>. Updated 2013. Accessed April 26, 2018.
2. Pham-Kanter G, Mello MM, Lehmann LS, Campbell EG, Carpenter D. Public awareness of and contact with physicians who receive industry payments: a national survey. *J Gen Intern Med* 2017. DOI: 10.1007/s11606-017-4012-3.

For peer review only

# BMJ Open

## Effect of the Public Disclosure of Industry Payments Information on Patients: Results from a Population-Based Natural Experiment

|                                 |                                                                                                                                                                                                                                                                                            |
|---------------------------------|--------------------------------------------------------------------------------------------------------------------------------------------------------------------------------------------------------------------------------------------------------------------------------------------|
| Journal:                        | <i>BMJ Open</i>                                                                                                                                                                                                                                                                            |
| Manuscript ID                   | bmjopen-2018-024020.R1                                                                                                                                                                                                                                                                     |
| Article Type:                   | Research                                                                                                                                                                                                                                                                                   |
| Date Submitted by the Author:   | 29-Sep-2018                                                                                                                                                                                                                                                                                |
| Complete List of Authors:       | Kanter, Genevieve; University of Pennsylvania Perelman School of Medicine, General Internal Medicine<br>Carpenter, Daniel; Harvard University<br>Lehmann, Lisa; Harvard Medical School<br>Mello, Michelle; Stanford University Stanford Law School; Stanford University School of Medicine |
| <b>Primary Subject Heading</b>: | Health services research                                                                                                                                                                                                                                                                   |
| Secondary Subject Heading:      | Ethics                                                                                                                                                                                                                                                                                     |
| Keywords:                       | MEDICAL ETHICS, Health policy < HEALTH SERVICES ADMINISTRATION & MANAGEMENT, Sunshine Act, physician industry relationships, Open Payments, conflict of interest                                                                                                                           |
|                                 |                                                                                                                                                                                                                                                                                            |

SCHOLARONE™  
Manuscripts

1  
2  
3 **EFFECT OF THE PUBLIC DISCLOSURE OF INDUSTRY PAYMENTS INFORMATION ON PATIENTS:**  
4  
5 **RESULTS FROM A POPULATION-BASED NATURAL EXPERIMENT**

6  
7 Genevieve P. Kanter, PhD<sup>1</sup>

8 Daniel Carpenter, PhD<sup>2</sup>

9  
10 Lisa Soleymani Lehmann, MD PhD<sup>3</sup>

11  
12 Michelle M. Mello, JD PhD<sup>4</sup>  
13  
14  
15

16 <sup>1</sup> Division of General Internal Medicine and Department of Medical Ethics and Health Policy,  
17 University of Pennsylvania Perelman School of Medicine, and Leonard Davis Institute of  
18 Health Economics, University of Pennsylvania; 1312-B Blockley Hall, 423 Guardian Drive,  
19 Philadelphia, PA 19104, USA; Tel 215.898.2703; Email gpkanter@penmedicine.upenn.edu.  
20  
21  
22  
23 *(Corresponding author)*  
24

25 <sup>2</sup> Department of Government and Radcliffe Institute for Advanced Study, Harvard University;  
26 1737 Cambridge Street, CGIS Knafel Building 405, Cambridge, MA 02138, USA; Tel  
27 617.495.8280; Email dcarpenter@gov.harvard.edu.  
28  
29

30 <sup>3</sup> Department of Medicine and Center for Bioethics, Harvard Medical School, and Department  
31 of Health Policy and Management, Harvard T. H. Chan School of Public Health, Boston, MA;  
32 National Center for Ethics in Health Care, Veterans Health Administration, Washington, DC;  
33 810 Vermont Avenue NW, Washington DC 20420, USA; Tel 202.632.8457; Email  
34  
35  
36  
37  
38  
39 lisa.lehmann@va.gov.

40 <sup>4</sup> Stanford Law School and Department of Health Research and Policy, Stanford University  
41 School of Medicine; 559 Nathan Abbott Way, Stanford, CA 94305, USA; Tel 650.725.3894;  
42  
43  
44  
45  
46  
47  
48 Email mmello@law.stanford.edu.

49  
50  
51  
52  
53  
54  
55  
56  
57  
58  
59  
60  
Word Count: 2685 (excluding title page, abstract, references, figures, and tables)

Keywords: physician industry relationships, Open Payments, public disclosure, transparency,  
industry payments, conflicts of interest, patient awareness

## ABSTRACT

### Objective

To determine the effect of the public disclosure of industry payments to physicians on patients' awareness of industry payments and knowledge about whether their physicians had accepted industry payments.

### Design

Interrupted time series with comparison group (difference-in-difference analyses of longitudinal survey).

### Setting

Nationally representative US population-based surveys. Surveys were conducted in September 2014, shortly prior to the public release of Open Payments information, and again in September 2016.

### Participants

Adults aged 18 and older (n=2,180).

### Main outcome measures

Awareness of industry payments as an issue; awareness that industry payments information was publicly available; knowledge of whether own physician had received industry payments.

### Results

Public disclosure of industry payments information through Open Payments did not significantly increase the proportion of respondents who knew whether their physician had received industry payments ( $p=0.918$ ). It also did not change the proportion of respondents who became aware of the

1  
2  
3 issue of industry payments ( $p=0.470$ ) but did increase the proportion who knew that payments  
4  
5 information was publicly available (9.6% points,  $p=0.011$ ).  
6  
7  
8  
9

### 10 **Conclusions**

11  
12 Two years after the public disclosure of industry payments information, Open Payments does not  
13  
14 appear to have achieved its goal of increasing patient knowledge of whether their physicians have  
15  
16 received money from pharmaceutical and medical device firms. Additional efforts will be required to  
17  
18 improve the utilization and effectiveness of Open Payments for consumers.  
19  
20  
21  
22  
23  
24  
25  
26  
27  
28  
29  
30  
31  
32  
33  
34  
35  
36  
37  
38  
39  
40  
41  
42  
43  
44  
45  
46  
47  
48  
49  
50  
51  
52  
53  
54  
55  
56  
57  
58  
59  
60

## STRENGTHS AND LIMITATIONS

- This is the first national policy evaluation of the effect of transparency of industry payments on patients.
- Findings are based on a strong natural experiment design: interrupted time series with comparison group (difference-in-difference).
- Nationally representative sample of respondents was followed longitudinally.
- Individuals lost to attrition between survey waves may have been different from those who completed the second wave.

## INTRODUCTION

In 2010, the United States Congress—concerned about the adverse influence of financial relationships between physicians and drug and device firms, and the lack of transparency surrounding these relationships—enacted the Physician Payments Sunshine Act.[1] As part of reforms included in the Affordable Care Act (ACA),[2] the Sunshine provision required pharmaceutical and medical device firms to report, for public release, detailed information on the financial payments and gifts of monetary value that these firms made to physicians. Payments for consulting and for serving as faculty speaker at continuing medical education events and conferences; for food/drink, travel, lodging, and entertainment; as well as for royalties and research were to be reported for public disclosure. The rationales underlying this disclosure requirement were that patients, in making health care decisions, would be better informed of the potential influence of industry ties on their physicians, and payment transparency could deter physicians from accepting payments that patients might view as suspect.[1,3]

Since the passage of the US Sunshine Act, similar initiatives have emerged in Europe and Canada. The European Federation of Pharmaceutical Industries and Associations (EFPIA) now requires, of its member countries, the public disclosure of pharmaceutical industry payments made to health care providers, although health care workers in some countries can refuse consent to the public disclosure of their individual-level information.[4,5] In Britain, industry payments to health care providers have been reported through the Disclosure UK programme as part of the EFPIA initiative,[6,7] with approximately 70% of providers participating in public disclosure.[8] In Ontario, Canada, legislation has been introduced requiring the public



1  
2  
3 disclosure of payments made by pharmaceutical and medical device firms to health care  
4  
5 providers.[9,10]  
6  
7

8 In the US, the Sunshine Act and its Open Payments programme have provided  
9  
10 policymakers and the public with a good overview of the scope, scale, and reach of industry  
11  
12 payments. In 2017, drug and device firms made \$8.4 billion in payments to physicians, of which  
13  
14 55% was directed towards research activities; the rest was primarily directed at informing and  
15  
16 influencing the clinical care delivered by physicians and remunerating them for consulting and  
17  
18 ownership interests.[11] Studies using Open Payments data have shown that about 48% of  
19  
20 physicians receive industry payments in a given year,[12] and 65% of patients see physicians  
21  
22 who had received payments in the previous year.[13]  
23  
24  
25  
26

27 The release of payments data has also enabled analyses showing associations between  
28  
29 industry payments and increased prescribing [14,15] and increased Medicare prescribing  
30  
31 costs.[16] Much more remains to be studied, but at the very least, the Open Payments  
32  
33 disclosure programme has begun to shed light on the flow of industry payments within the  
34  
35 health care system.  
36  
37  
38

39 One important outstanding question is the degree to which the transparency initiatives  
40  
41 like the Sunshine Act and the EFPIA Code improve, in practice, patient awareness and  
42  
43 knowledge of industry payments. We sought to rigorously evaluate the effects of transparency  
44  
45 on patients by examining the effect of the Open Payments programme, the earliest of these  
46  
47 industry payments transparency initiatives. In a national longitudinal survey fielded before and  
48  
49 after the Sunshine Act's data release in 2014, we investigated awareness and knowledge of  
50  
51 industry payments to physicians among a representative cohort of American adults. Because 3  
52  
53  
54  
55  
56  
57  
58  
59  
60

1  
2  
3 US states had already made industry payments information publicly available, respondents in  
4  
5 these states served as a comparison group (since they already had prior exposure to this  
6  
7 information) for those who became newly apprised of payments information with the release  
8  
9 of Open Payments data. This design improves on a simple pre/post design and allows for a  
10  
11 better-controlled evaluation of the effect of the Sunshine Act. Findings from the US experience  
12  
13 can guide implementation of transparency programmes in other countries.  
14  
15  
16  
17  
18  
19

## 20 **DATA AND METHODS**

### 21 **Sample**

22  
23  
24  
25 The sample for our initial survey consisted of 3,542 American adults aged 18 and older  
26  
27 selected from KnowledgePanel (KP), a large, nationally representative US household panel  
28  
29 maintained by the research firm GfK. KP households are selected through address-based  
30  
31 sampling so that the sampling frame covers 97% of US households, including non-Internet  
32  
33 households. Details on survey sampling methodology are provided in Appendix S1.  
34  
35  
36

37 We drew a nationally representative sample with oversampling in Massachusetts and  
38  
39 Minnesota to enable us to detect smaller effects in these two states, which had previously  
40  
41 passed "Sunshine laws" requiring the public disclosure of industry payments made to physicians  
42  
43 in the state. (We did not oversample Vermont, which also had a preexisting disclosure law,  
44  
45 because an oversample of this relatively small population would still not have generated  
46  
47 sufficient power to detect an effect in that state.) We refer to these two states and Vermont as  
48  
49 "Sunshine states."  
50  
51  
52  
53  
54  
55  
56  
57  
58  
59  
60

1  
2  
3 The sample of respondents for the follow-up survey consisted of the group of all Wave 1  
4 respondents who were available for re-contact (2,711/3,542=77%). Appendix S2 shows the flow  
5 diagram for sample selection. Individuals who were not available for re-contact were more  
6 likely to be racial/ethnic minorities and not be in paid employment than those who were re-  
7 contacted, but were similar along most other dimensions (Appendix S3).  
8  
9  
10  
11  
12  
13  
14  
15  
16  
17

### 18 **Patient and public involvement statement**

19  
20 The study did not involve patients. The results of the survey will be given to GfK for  
21 dissemination.  
22  
23  
24  
25  
26  
27

### 28 **Survey Design**

29  
30 GfK administered the 6-minute Wave 1 survey and the 10-minute Wave 2 survey online.  
31 Both surveys included items on awareness and knowledge of industry payments (questions  
32 provided in Appendix S4). In particular, we asked whether respondents were aware of the issue  
33 of industry payments, knew that industry payments information was publicly available, and  
34 knew if the physician they had seen most frequently during the past 12 months had received  
35 payments. Survey data were linked to information on respondents' sociodemographic and self-  
36 reported health characteristics provided by GfK.  
37  
38  
39  
40  
41  
42  
43  
44  
45  
46  
47  
48  
49

### 50 **Survey Administration**

1  
2  
3 The first survey was fielded September 26-October 3, 2014, with almost all surveys  
4  
5 (94%) completed by the Open Payments data release date of September 30. Details on  
6  
7 administration of the Wave 1 survey are available elsewhere.[13]  
8  
9

10 The Wave 2 survey was fielded September 16-October 2, 2016, two years after the  
11  
12 initial survey. Appendix S1 provides further details on Wave 2 survey administration.  
13  
14

15 The Drexel University Institutional Review Board determined that the foregoing survey  
16  
17 protocol was not research involving human subjects as defined by the US Department of Health  
18  
19 and Human Services and Food and Drug Administration guidelines.  
20  
21  
22  
23  
24

## 25 **Statistical Analysis**

26  
27 We used a difference-in-difference approach (interrupted time-series with control) to  
28  
29 estimate the effects of the national, public release of Open Payments information.[17-19] To  
30  
31 estimate the effect of the Open Payments release, we compared mean changes in the  
32  
33 outcomes of interest among individuals residing in states that did not have state Sunshine laws  
34  
35 to changes among persons residing in states with Sunshine laws (Massachusetts, Minnesota,  
36  
37 and Vermont). By using the Sunshine states as comparators, we could improve on a simple  
38  
39 pre/post study design and account for secular trends affecting all states--for example, changes  
40  
41 associated with the ACA--that otherwise could have confounded our estimates of the effect of  
42  
43 payments disclosure.  
44  
45  
46  
47  
48

49 We calculated unadjusted and adjusted difference-in-difference effects. Regression-  
50  
51 adjusted models—used to increase precision of the estimates--included age, education  
52  
53 categories, urban residence, household income categories, employment categories, previous  
54  
55  
56  
57  
58

1  
2  
3 diagnosis of any of 21 chronic conditions, previous diagnosis of cancer, previous diagnoses of  
4  
5 stroke or myocardial infarction, previous diagnosis of a mental health disorder, number of  
6  
7 physician visits, whether insured, quadratic terms of age and number of visits, year fixed  
8  
9 effects, and individual fixed effects (which absorb gender, race/ethnicity, and other time-  
10  
11 invariant individual characteristics). Standard errors were clustered at the state level. All  
12  
13 analyses used GfK-constructed longitudinal weights adjusting for non-coverage, nonresponse,  
14  
15 and oversampling.  
16  
17  
18  
19

20 Analyses were conducted using Stata 14 (College Station, TX). Full regression results for  
21  
22 models with and without individual fixed effects are reported in Appendix S5. Results from  
23  
24 alternative specifications, including unweighted models, are reported in Appendix S6.  
25  
26  
27  
28  
29

## 30 RESULTS

### 31 Sample Characteristics

32  
33  
34 Of the 2,711 respondents from Wave 1 who were re-contacted, 80% completed the  
35  
36 survey, for an overall completion rate of 62%. (A non-response analysis may be found in  
37  
38 Appendix S3.) Table 1 presents the characteristics of Wave 1 and Wave 2 respondents.  
39  
40 Respondents in the two waves were similar along most sociodemographic and health  
41  
42 dimensions. In the balanced panel consisting of individuals who responded to both surveys  
43  
44 (n=2,180), respondents who lived in Sunshine states (n=208, 4% weighted) were similar along  
45  
46 almost all dimensions to those who lived in non-Sunshine states (n=1,972).  
47  
48  
49  
50  
51  
52  
53

### 54 Effect of Disclosure on Awareness and Knowledge of Industry Payments

Columns 1 and 2 of Table 2 show, respectively, the unadjusted 2014 and 2016 levels of awareness and knowledge of industry payments in Sunshine and non-Sunshine states among individuals who responded to both survey waves. Prior to Open Payments, non-Sunshine state residents had lower awareness of the issue of industry payments than residents of Sunshine states (45.5% vs. 58.0%), as well as lower awareness that industry payments information was publicly available (9.8% vs. 19.4%).

After Open Payments, overall awareness of the issue increased in both Sunshine and non-Sunshine states, with a relatively greater increase in awareness in non-Sunshine states (8.7% points vs. 5.6% points). Awareness that industry payments information was publicly available also increased more in non-Sunshine states relative to Sunshine states, which exhibited a decline in reported awareness (3.2% points vs. -6.7% points).

In both Sunshine and non-Sunshine states, a very small proportion of respondents said they knew whether their own doctor had received industry payments prior to the public release of data (3.8% and 4.4%, respectively). In both types of states, this knowledge about their own doctors changed little after the public release.

Columns 4 and 5 of Table 2 compare the changes in awareness and knowledge in non-Sunshine states, which were newly exposed to the payments information, to changes in Sunshine states. Column 4 reports the unadjusted difference (DD) estimates of the effect of the Open Payments data release and Column 5 reports the regression-adjusted DD estimates of the effect. The DD estimates show that Open Payments did not increase awareness of the issue of industry payments ( $p=0.470$ ), but did significantly increase awareness that industry payments information was publicly available (9.6 % points,  $p=0.011$ ). The release of Open Payments data

1  
2  
3 did not, however, increase knowledge about whether one's own doctor had received payments  
4  
5 (p=0.918).  
6  
7  
8  
9

## 10 **DISCUSSION**

11  
12  
13 A key objective of the Sunshine Act was to improve the information available to patients  
14  
15 about their physicians' financial ties with industry.[1,3] In this first national evaluation of the  
16  
17 effect of the Sunshine Act on patients, we found that although Open Payments increased  
18  
19 awareness that industry payments information was publicly available, it did not increase  
20  
21 people's knowledge of whether their own doctor had received payments. Two years after the  
22  
23 Open Payments release, 13% of respondents knew that industry payments information about  
24  
25 their physicians was available, and only 3% of respondents knew whether their doctor had  
26  
27 received payments. These findings, together with findings from an earlier study showing that  
28  
29 1.5% of survey respondents had used the Open Payments database,[20] suggest that Open  
30  
31 Payments has fallen well short of its aspiration to better inform patients of their physicians'  
32  
33 industry relationships.  
34  
35  
36  
37  
38  
39

40 Our findings of a minimal effect of disclosure on patients are consistent with the  
41  
42 experience of transparency initiatives in other areas of medicine. Studies of the effect of the  
43  
44 disclosure of physician and hospital quality have shown that patients have been largely  
45  
46 unaware of and rarely use the information made available.[21-23] Providers have been more  
47  
48 responsive,[21,22] so Open Payments may well have effects on physician behavior.  
49  
50  
51

52 There was a significant increase, of almost 10% points, in awareness that payments  
53  
54 information was publicly available. This effect was driven by an increase in awareness in states  
55  
56  
57  
58  
59  
60

1  
2  
3 in which payments information was newly available, as expected, and by a decrease in  
4  
5 awareness in Sunshine states, where that information was already available. The decline in  
6  
7 Sunshine states likely reflects the effect of media attention in the pre-period surrounding the  
8  
9 Open Payments data release, which activated short-term awareness that quickly decayed. This  
10  
11 decline does not appear to be driven by differential attrition patterns in Sunshine states versus  
12  
13 non-Sunshine states, as there did not appear to be significant differences in the observed  
14  
15 characteristics of Wave 1 respondents lost to follow up across the two types of states (results  
16  
17 available upon request).

18  
19  
20  
21  
22  
23 Our DD strategy provides estimates that are more credibly interpreted as causal—rather  
24  
25 than simply associational—because Sunshine states can be used as a comparison group.  
26  
27 Nevertheless, there are some limitations to the study. With DD, confounding might occur if  
28  
29 there were other aspects of the health care environment affecting awareness and knowledge of  
30  
31 industry payments that affected Sunshine states but not non-Sunshine states, or vice versa.  
32  
33 One possible source of confounding is that the three Sunshine states all participated in the  
34  
35 Medicaid expansion, possibly increasing patient engagement in these states. We conduct  
36  
37 sensitivity analyses, estimating models with an indicator for Medicaid expansion and models  
38  
39 restricting the sample to only residents in Medicaid expansion states; our findings are robust to  
40  
41 these adjustments (Appendix S6). We are not aware of other changes that would have  
42  
43 differentially affected Massachusetts, Minnesota, and Vermont versus non-Sunshine states  
44  
45 during this period. Secondly, a general concern raised with web-based household panels is that  
46  
47 refusal to participate in the panel could lead to sample non-representativeness relative to the  
48  
49 population. Previous studies have shown, however, that there appears to be very little bias in  
50  
51  
52  
53  
54  
55  
56  
57  
58  
59  
60



1  
2  
3 the KN panel in the area of health and health-related behavior.[24,25] An additional concern is  
4  
5 that survey respondents may not have been fully representative of US households because of  
6  
7 attrition. Although the response rate among persons invited to take the Wave 2 survey was  
8  
9 high (80%), and the overall completion rate between the first and second survey was within  
10  
11 survey norms (62%), those who left the sample may have been different from those who  
12  
13 remained. In a separate analysis, we found that individuals lost to attrition had reported, during  
14  
15 Wave 1, less education and less health insurance coverage but were otherwise similar along  
16  
17 most other dimensions, including health status (Appendix S3). To correct for some of the  
18  
19 attrition bias, we used longitudinal weights that matched the distribution of key demographic  
20  
21 characteristics of our survey sample to the distribution of the US population (see Appendix S1).  
22  
23  
24  
25  
26

27  
28 In summary, because very few patients are aware of, much less accessing, information  
29  
30 available through Open Payments, efforts beyond the unveiling of a public website will be  
31  
32 required to improve patient use of industry payments information. These efforts could come  
33  
34 from the Centers for Medicaid and Medicare Services (CMS), which oversees Open Payments  
35  
36 and also administers Medicare and Medicaid programmes. For example, CMS could use its pre-  
37  
38 existing relationships with Medicare and Medicaid beneficiaries to highlight payments  
39  
40 information and integrate it with other online CMS resources that beneficiaries use regularly.  
41  
42 CMS could engage in more active outreach by providing informative leaflets for Medicare and  
43  
44 Medicaid patient support organizations to distribute, or by launching media campaigns.  
45  
46  
47  
48

49  
50 More broadly, beyond CMS, health insurers could provide information about industry  
51  
52 payments on “Find a Physician” websites where patients go to select doctors from within a  
53  
54  
55  
56  
57

1  
2  
3 network. In addition, physicians themselves who value their "pharm-free" status [26] could  
4  
5 highlight this fact to current and prospective patients.  
6  
7

8           As transparency efforts in Europe and Canada advance, the US experience with the  
9  
10 Sunshine Act can help inform policymaking in these other regions, although cross-country  
11  
12 differences in enacted legislation should be taken into account. EFPIA, for example, does not  
13  
14 include reporting of payments made for food and beverage, a category that accounts for a large  
15  
16 percentage of industry payments in the US,[12,13] and is thought to be an important influence  
17  
18 on prescriber behavior.[27] Similarly, payments for research and development are not  
19  
20 reported, under the EFPIA code, at the individual physician level—only at the aggregate level.  
21  
22 This partial disclosure of payments suggests that patients in the 33 countries covered by EFPIA  
23  
24 may have even less incentive to seek out payments information than patients in the US.  
25  
26  
27  
28  
29

30           We found that web-based public disclosure is limited in its ability to inform patients  
31  
32 about physicians and their industry interests. Additional policy initiatives will likely be required  
33  
34 in the US and elsewhere to widely disseminate industry payments information and make it  
35  
36 more salient for patients.  
37  
38  
39  
40  
41  
42  
43  
44  
45  
46  
47  
48  
49  
50  
51  
52  
53  
54  
55  
56  
57  
58  
59  
60

## CONTRIBUTORSHIP STATEMENT

Study concept and design: Kanter, Mello

Acquisition, analysis, or interpretation of data: Kanter, Mello, Carpenter, Lehmann

Drafting of the manuscript: Kanter

Critical revision of the manuscript for important intellectual content: Kanter, Mello, Carpenter, Lehmann

Statistical analysis: Kanter

Administrative, technical, or material support: Kanter, Mello, Carpenter, Lehmann

Study supervision: Kanter

Dr. Kanter had full access to the data and takes full responsibility for the integrity of the data and the accuracy of the data analysis. All authors have read, revised, and approved the final version of the paper.

## DATA SHARING STATEMENT

No additional data are available.

## COMPETING INTERESTS

The authors have no competing interests to disclose.

## FUNDING

This research was funded by the Greenwall Foundation.

**REFERENCES**

1. Centers for Medicare and Medicaid Services. 42 CFR Parts 402 and 403. Medicare, Medicaid, children's health insurance programs; transparency reports and reporting of physician ownership or investment interests. Federal Register 78. 2013.  
<https://www.cms.gov/OpenPayments/Downloads/Affordable-Care-Act-Section-6002-Final-Rule.pdf>. Accessed September 26, 2018.
2. Section 6002 of the Patient Protection and Affordable Care Act. Public Law 111-148.  
<http://www.gpo.gov/fdsys/pkg/PLAW-111publ148/pdf/PLAW-111publ148.pdf>. Accessed September 26, 2018.
3. US Senate special committee on aging. Grassley, Kohl say public should know when pharmaceutical makers give money to doctors. Press release. September 7, 2007.  
<http://www.aging.senate.gov/press-releases/grassley-kohl-say-public-should-know-when-pharmaceutical-makers-give-money-to-doctors>. Accessed September 26, 2018.
4. European Federation of Pharmaceutical Industries and Associations. Disclosure of payments to HCPs. <https://www.efpia.eu/relationships-codes/disclosure-of-payments-to-hcps/>. Accessed September 26, 2018.
5. Bulik BS. 'Sunshine' hits Europe: Pharma's doc payments now available, but numbers are far from comprehensive. FiercePharma. July 25, 2016. <https://www.fiercepharma.com/marketing/sunshine-finally-reaches-europe-disclosure-pharma-payments-to-docs-now-available>. Accessed September 26, 2018.
6. Association of the British Pharmaceutical Industry. Disclosure UK. <http://www.abpi.org.uk/ethics/ethical-responsibility/disclosure-uk/>. Accessed September 26, 2018.

- 1  
2  
3 7. Adlington K, Godlee F. Disclosure UK: transparency should no longer be an optional extra.  
4  
5 BMJ 2016; 354:i3730 doi:10.1136/bmj.i3730.  
6  
7
- 8 8. Hawkes N. Doctors getting biggest payments from drug companies don't declare them on  
9  
10 new website. BMJ 2016; 354:i3679 doi:10.1136/bmj.i3679.  
11  
12
- 13 9. Hoskins E. Bill 160, Strengthening Quality and Accountability for Patients Act, 2017.  
14  
15 <https://www.ontario.ca/laws/statute/S17025>. Accessed September 26, 2018.  
16  
17
- 18 10. Government of Ontario. Ontario passes legislation to strengthen transparency in health  
19  
20 care. News release. December 12, 2017. [https://news.ontario.ca/mohltc/en/2017/12/](https://news.ontario.ca/mohltc/en/2017/12/strengthening-quality-and-accountability-for-patients-act-2017-1.html)  
21  
22 [strengthening-quality-and-accountability-for-patients-act-2017-1.html](https://news.ontario.ca/mohltc/en/2017/12/strengthening-quality-and-accountability-for-patients-act-2017-1.html). Accessed September  
23  
24 26, 2018.  
25  
26
- 27 11. The Facts About Open Payments Data. <https://openpaymentsdata.cms.gov/summary>.  
28  
29 Accessed September 26, 2018.  
30  
31
- 32 12. Tringale KR, Marshall D, Mackey TK, Connor M, Murphy JD, Hattangadi-Gluth JA. Types and  
33  
34 distribution of payments from industry to physicians in 2015. JAMA 2017; 317:1774-1784.  
35  
36
- 37 13. Pham-Kanter G, Mello MM, Lehmann LS, Campbell EG, Carpenter D. Public awareness of  
38  
39 and contact with physicians who receive industry payments: a national survey. J Gen Intern  
40  
41 Med 2017; 32:767-774 doi 10.1007/s11606-017-4012-3.  
42  
43
- 44 14. DeJong C, Aguilar T, Tseng CW, Lin GA, Boscardin WJ, Dudley RA. Pharmaceutical industry-  
45  
46 sponsored physician prescribing patterns for Medicare beneficiaries. JAMA Intern Med  
47  
48 2016; 176:1114-1122.  
49  
50  
51  
52  
53  
54  
55  
56  
57

- 1  
2  
3 15. Fleischman W, Agrawal S, King M, Venkatesh AK, Krumholz HM, McKee D, Brown D.  
4  
5 Association between payments from manufacturers of pharmaceuticals to physicians and  
6  
7 regional prescribing: cross sectional ecological study. *BMJ* 2016; 365:i4189.  
8  
9
- 10 16. Perlis RH, Perlis CS. Physician payments from industry are associated with greater Medicare  
11  
12 Part D prescribing costs. *PLOS One* 11:30155474.  
13  
14
- 15 17. Wooldridge JJ. *Econometric analysis of cross section and panel Data*. Cambridge, MA: MIT  
16  
17 Press; 2002.  
18  
19
- 20 18. Cameron CA, Trivedi PK. *Microeconometrics: methods and applications*. New York:  
21  
22 Cambridge University Press; 2005.  
23  
24
- 25 19. Shadish WR, Cook TD, Campbell DT. *Experimental and quasi-experimental designs for*  
26  
27 *generalized causal inference*. Boston: Houghton Mifflin; 2002.  
28  
29
- 30 20. Young PD, Xie D, Schmidt H. Towards patient-centered conflicts of interest policy. *Int J*  
31  
32 *Health Policy Manag* 2018; 7:112-119.  
33  
34
- 35 21. Fung CH, LiM Y, Mattke S, Damberg C, Shekelle PG. Systematic review: the evidence that  
36  
37 publishing patient care performance data improves quality of care. *Ann Intern Med* 2008;  
38  
39 148:111-123.  
40  
41
- 42 22. Marshall MN, Shekelle PG, Leatherman S, Brook RH. The public release of performance  
43  
44 data: what do we expect to gain? a review of the evidence. *JAMA* 2000; 283(14):1866-74.  
45  
46
- 47 23. Schauffler HH, Mordavsky JK. Consumer reports in health care: do they make a difference?  
48  
49 *Annu Rev Public Health* 2001; 22:69-89.  
50  
51
- 52 24. Baker LC, Bundorf MK, Singer S, Wagner TH. *Validity of the survey of health and internet*  
53  
54 *and knowledge network's panel and sampling*. Stanford, CA: Stanford University; 2003.  
55  
56  
57

- 1  
2  
3 25. Huggins VJ, Dennis MJ, Seryakova K. An evaluation of nonresponse bias in internet surveys  
4  
5 conducted using the knowledge networks panel. Proceedings of the Survey Research  
6  
7 Methods Section, Joint Statistical Meetings of the American Statistical Association 2002;  
8  
9 1525-1530.  
10  
11  
12  
13 26. AMSA. PharmFree: Promoting evidence-based prescribing, pharmaceutical innovation, and  
14  
15 access to medicines. <http://www.pharmfree.org/>. Accessed September 26, 2018.  
16  
17  
18 27. Wazana A. Physicians and the pharmaceutical industry: is a gift ever just a gift? JAMA 200;  
19  
20 283:373-380.  
21  
22  
23  
24  
25  
26  
27  
28  
29  
30  
31  
32  
33  
34  
35  
36  
37  
38  
39  
40  
41  
42  
43  
44  
45  
46  
47  
48  
49  
50  
51  
52  
53  
54  
55  
56  
57  
58  
59  
60

**Table 1. Characteristics Of Respondents By Wave And By Sunshine State Residence**

|                       | Weighted Distribution %   |                           | Statistical significance (Bonferroni correction) <sup>a</sup> | Weighted Distribution % <sup>b</sup> |              | Statistical significance (Bonferroni correction) <sup>a</sup> |
|-----------------------|---------------------------|---------------------------|---------------------------------------------------------------|--------------------------------------|--------------|---------------------------------------------------------------|
|                       | Wave 1, 2014<br>(n=3,542) | Wave 2, 2016<br>(n=2,180) |                                                               | Sunshine<br>Balanced Panel (n=2,180) | non-Sunshine |                                                               |
| Gender                |                           |                           | n.s.                                                          |                                      |              | n.s.                                                          |
| Female                | 52%                       | 52%                       |                                                               | 55%                                  | 52%          |                                                               |
| Male                  | 48%                       | 48%                       |                                                               | 45%                                  | 48%          |                                                               |
| Race/Ethnicity        |                           |                           | n.s.                                                          |                                      |              | **                                                            |
| Caucasian             | 66%                       | 65%                       |                                                               | 92%                                  | 63%          |                                                               |
| Hispanic              | 15%                       | 16%                       |                                                               | 3%                                   | 16%          |                                                               |
| Black, Non-Hispanic   | 11%                       | 12%                       |                                                               | 2%                                   | 12%          |                                                               |
| Other                 | 8%                        | 8%                        |                                                               | 2%                                   | 8%           |                                                               |
| Age                   |                           |                           | n.s.                                                          |                                      |              | n.s.                                                          |
| <=20                  | 4%                        | 2%                        |                                                               | 1%                                   | 5%           |                                                               |
| 21-30                 | 19%                       | 18%                       |                                                               | 15%                                  | 19%          |                                                               |
| 31-40                 | 16%                       | 17%                       |                                                               | 15%                                  | 17%          |                                                               |
| 41-50                 | 15%                       | 17%                       |                                                               | 15%                                  | 16%          |                                                               |
| 51-60                 | 21%                       | 21%                       |                                                               | 28%                                  | 21%          |                                                               |
| 61+                   | 25%                       | 26%                       |                                                               | 26%                                  | 22%          |                                                               |
| Education             |                           |                           | n.s.                                                          |                                      |              | n.s.                                                          |
| Less than high school | 12%                       | 11%                       |                                                               | 4%                                   | 13%          |                                                               |
| High school graduate  | 30%                       | 29%                       |                                                               | 28%                                  | 31%          |                                                               |
| Some college          | 29%                       | 29%                       |                                                               | 26%                                  | 27%          |                                                               |
| College graduate      | 29%                       | 32%                       |                                                               | 41%                                  | 29%          |                                                               |
| Household Income      |                           |                           | n.s.                                                          |                                      |              | *                                                             |
| \$0 - \$24,999        | 18%                       | 17%                       |                                                               | 8%                                   | 14%          |                                                               |
| \$25,000 - \$49,999   | 22%                       | 21%                       |                                                               | 15%                                  | 21%          |                                                               |



|    |                                             |     |     |      |     |      |
|----|---------------------------------------------|-----|-----|------|-----|------|
| 1  |                                             |     |     |      |     |      |
| 2  |                                             |     |     |      |     |      |
| 3  | \$50,000 - \$74,999                         | 18% | 18% | 15%  | 18% |      |
| 4  | \$75,000 - \$99,999                         | 15% | 14% | 17%  | 14% |      |
| 5  | \$100,000+                                  | 26% | 30% | 45%  | 33% |      |
| 6  |                                             |     |     |      |     |      |
| 7  | Employment                                  |     |     | **   |     | n.s. |
| 8  | Employed for pay                            | 51% | 57% | 60%  | 54% |      |
| 9  | Self-employed                               | 7%  | 6%  | 8%   | 7%  |      |
| 10 | Retired                                     | 19% | 18% | 20%  | 17% |      |
| 11 | Not working-disability                      | 7%  | 6%  | 3%   | 7%  |      |
| 12 | Not working-other                           | 17% | 12% | 9%   | 16% |      |
| 13 |                                             |     |     |      |     |      |
| 14 | Urban/Rural                                 |     |     | n.s. |     | n.s. |
| 15 | Urban                                       | 84% | 86% | 88%  | 84% |      |
| 16 | Rural                                       | 16% | 14% | 12%  | 16% |      |
| 17 |                                             |     |     |      |     |      |
| 18 | Resides in State with Sunshine Law          |     |     | n.s. |     | ..   |
| 19 | No                                          | 96% | 96% | ..   | ..  |      |
| 20 | Yes                                         | 4%  | 4%  | ..   | ..  |      |
| 21 |                                             |     |     |      |     |      |
| 22 | Self-rated Health                           |     |     | n.s. |     | n.s. |
| 23 | Excellent                                   | 14% | 13% | 17%  | 14% |      |
| 24 | Good                                        | 61% | 64% | 64%  | 63% |      |
| 25 | Fair                                        | 21% | 20% | 19%  | 21% |      |
| 26 | Poor                                        | 4%  | 3%  | 1%   | 3%  |      |
| 27 |                                             |     |     |      |     |      |
| 28 | Diagnosis of chronic condition <sup>c</sup> |     |     | n.s. |     | n.s. |
| 29 | No                                          | 45% | 46% | 39%  | 45% |      |
| 30 | Yes                                         | 55% | 54% | 61%  | 55% |      |
| 31 |                                             |     |     |      |     |      |
| 32 | Diagnosis of mental health disorder         |     |     | **   |     | n.s. |
| 33 | No                                          | 82% | 98% | 82%  | 83% |      |
| 34 | Yes                                         | 18% | 2%  | 18%  | 17% |      |
| 35 |                                             |     |     |      |     |      |
| 36 | Diagnosis of cancer                         |     |     | *    |     | n.s. |
| 37 | No                                          | 91% | 94% | 92%  | 92% |      |
| 38 | Yes                                         | 9%  | 6%  | 8%   | 8%  |      |
| 39 |                                             |     |     |      |     |      |
| 40 |                                             |     |     |      |     |      |
| 41 |                                             |     |     |      |     |      |
| 42 |                                             |     |     |      |     |      |
| 43 |                                             |     |     |      |     |      |
| 44 |                                             |     |     |      |     |      |
| 45 |                                             |     |     |      |     |      |
| 46 |                                             |     |     |      |     |      |
| 47 |                                             |     |     |      |     |      |

|                                              |     |     |      |     |     |      |
|----------------------------------------------|-----|-----|------|-----|-----|------|
| Diagnosis of stroke or myocardial infarction |     |     | n.s. |     |     | n.s. |
| No                                           | 97% | 95% |      | 98% | 97% |      |
| Yes                                          | 3%  | 5%  |      | 2%  | 3%  |      |
| Any health insurance coverage                |     |     | **   |     |     | n.s. |
| No                                           | 18% | 8%  |      | 8%  | 16% |      |
| Yes                                          | 82% | 92% |      | 92% | 84% |      |

\*\* significant at 0.01 level with Bonferroni correction (0.01/13=0.00077)

\* significant at 0.05 level with Bonferroni correction (0.05/13=0.0038)

n.s. not significant

Percentages may not add up to 100 because of rounding.

Notes:

a. p-values are from chi-squared test of independence with Rao-Scott correction, testing the difference in distribution values between the two groups of respondents. Asterisks indicate significance with Bonferroni correction.

b. Respondent characteristics from Wave 1 (2014) survey.

c. Chronic conditions include acid reflux, asthma, COPD, atrial fibrillation, chronic pain, cystic fibrosis, diabetes, epilepsy, eye disease, gout, heart disease, hepatitis C, hypertension, high cholesterol, HIV, kidney disease, multiple sclerosis, osteoarthritis, osteoporosis, rheumatoid arthritis, sleep disorder.

**Table 2. Changes In Awareness And Knowledge Of Industry Payments After Payments Information Disclosure**

|                                                                                 | Mean or Percentage |       | Change<br>2014-16 | Difference-in-Difference Estimates    |                                                                      | P value <sup>b</sup> |
|---------------------------------------------------------------------------------|--------------------|-------|-------------------|---------------------------------------|----------------------------------------------------------------------|----------------------|
|                                                                                 | 2014               | 2016  |                   | Unadjusted<br>Difference in<br>Change | Regression-Adjusted<br>Difference in<br>Change (95% CI) <sup>a</sup> |                      |
|                                                                                 |                    |       |                   |                                       |                                                                      |                      |
| <b>Awareness and Knowledge of Industry Payments (% Answering Yes)</b>           |                    |       |                   |                                       |                                                                      |                      |
| Aware of industry payments (2014 mean 46.0, sd 49.8)                            |                    |       |                   |                                       |                                                                      |                      |
| Non-Sunshine states                                                             | 45.5%              | 54.1% | 8.7%              | 3.1%                                  | 2.3%                                                                 | 0.4701               |
| Sunshine states                                                                 | 58.0%              | 63.6% | 5.6%              |                                       | (-4.0%,8.6%)                                                         |                      |
| Aware that industry payments info publicly available (2014 mean 10.2, sd 30.2)  |                    |       |                   |                                       |                                                                      |                      |
| Non-Sunshine states                                                             | 9.8%               | 12.9% | 3.2%              | 9.9%                                  | 9.6%                                                                 | 0.0108*              |
| Sunshine states                                                                 | 19.4%              | 12.6% | -6.7%             |                                       | (2.3%,16.9%)                                                         |                      |
| Know whether own doctor has received industry payments (2014 mean 4.4, sd 20.5) |                    |       |                   |                                       |                                                                      |                      |
| Non-Sunshine states                                                             | 4.4%               | 3.1%  | -1.3%             | -0.2%                                 | -0.1%                                                                | 0.9183               |
| Sunshine states                                                                 | 3.8%               | 2.7%  | -1.1%             |                                       | (-2.3%,2.0%)                                                         |                      |

\* significant at 0.05 level

\*\* significant at 0.01 level

Analyses of awareness and knowledge measures based on balanced panel of individuals with non-missing survey items who responded to both 2014 and 2016 surveys: 1,831 non-Sunshine residents and 197 Sunshine residents for awareness of payments; 1,834 non-Sunshine residents and 196 Sunshine residents for awareness that payments information was public and for knowledge of whether own doctor had received payments.

## Notes:

a. Regression models include age, education categories, urban residence, household income categories, employment categories, previous diagnosis of chronic conditions (which include acid reflux, asthma, COPD, atrial fibrillation, chronic pain, cystic fibrosis, diabetes, epilepsy, eye disease, gout, heart disease, hepatitis C, hypertension, high cholesterol, HIV, kidney disease, multiple sclerosis, osteoarthritis, osteoporosis, rheumatoid arthritis, sleep disorder), previous diagnosis of cancer, previous diagnosis of stroke or myocardial infarction, previous diagnosis of mental health disorder, number of visits to the doctor, whether insured, quadratic terms of age and number of visits to account for non-linearities in age and visits, year fixed effects, and individual fixed effects (which absorb gender, race/ethnicity, and other time-invariant individual characteristics). All analyses used Gfk-constructed weights that adjusted for non-coverage, nonresponse, oversampling, and attrition. Standard errors were clustered at the state level.

b. Reported *P* values for regression-adjusted change.

1  
2  
3 **EFFECT OF THE PUBLIC DISCLOSURE OF INDUSTRY PAYMENTS INFORMATION ON PATIENTS:**  
4 **RESULTS FROM A POPULATION-BASED NATURAL EXPERIMENT**  
5  
6  
7  
8  
9

10 **SUPPLEMENTARY APPENDIX**  
11  
12  
13

- 14  
15 S1. Survey sampling methods  
16 S2. Sample selection flow diagram  
17 S3. Characteristics of Wave 2 respondents and non-respondents  
18 S4. Survey questions  
19 S5. Full regression results  
20 S5a. Models with individual fixed effects  
21 S5b. Models without individual fixed effects  
22  
23 S6. Alternative specifications  
24 S6a. Unweighted models  
25 S6b. Models without individual fixed effects  
26 S6c. Regression-adjusted models that include an indicator for Medicaid expansion  
27 S6d. Medicaid expansion states only  
28  
29  
30  
31  
32  
33  
34  
35  
36  
37  
38  
39  
40  
41  
42  
43  
44  
45  
46  
47  
48  
49  
50  
51  
52  
53  
54  
55  
56  
57  
58  
59  
60

1 MANUSCRIPT: PUBLIC DISCLOSURE OF INDUSTRY PAYMENTS  
2  
3

4 **SUPPLEMENTARY APPENDIX S1**  
5 **SURVEY SAMPLING METHODS**  
6  
7

8 *Survey Sampling and Administration*  
9

10 Individuals selected for the initial (Wave 1) survey were recruited from KnowledgePanel® (KP), a  
11 nationally representative household panel assembled by the research firm GfK. KP households are  
12 selected through random digit dialing and address-based sampling so that landline households as well as  
13 cell-phone-only and no-phone households are in a sampling frame covering 97% of US households. KP  
14 households agree to participate in occasional surveys and, in return for their participation, accumulate  
15 points that they can redeem for cash, merchandise, and other items of monetary value (average  
16 accumulation valued at \$4-\$6 per month). Households without Internet access are provided a web-  
17 enabled computer and free Internet service for the duration of their participation in the panel. Detailed  
18 information about KP sampling methodology, incentive structures, informed consent, and other human  
19 subjects issues are documented in Dennis and Thomas (2013).<sup>1</sup>  
20  
21

22 For Wave 1, individuals were sampled from KP households in all 50 states, excluding DC, to  
23 constitute a nationally representative sample, with oversampling in Massachusetts and Minnesota to  
24 enable us to detect smaller effects in these two states that had previously passed Sunshine laws. We did  
25 not oversample Vermont, the third Sunshine state, because even an oversample of this relatively small  
26 population would have not have generated sufficient power to detect an effect in that state.  
27  
28

29 The Wave 1 sample consisted of 3,542 respondents who completed the initial survey in 2014  
30 (Wave 1 completion 45.9%). More details on administration of the Wave 1 survey may be found in  
31 Pham-Kanter et al (2017).<sup>2</sup>  
32

33 For Wave 2, GfK identified 2,711 (77%) respondents from Wave 1 respondents who were still in  
34 the panel in 2016 and who were available for re-contact. All of these individuals were asked to complete  
35 the Wave 2 survey.  
36  
37

38 *Survey Field Period*  
39

40 The first survey was fielded online September 26-October 3, 2014, with almost all surveys (94%)  
41 completed by the Open Payments data release date of September 30. The Wave 2 survey was fielded  
42 online September 16-October 2, 2016, two years after the initial survey.  
43

44 Individuals selected for the surveys received a notification email with a link to the survey. After  
45 three days, individuals who had not responded to the survey were sent an email reminder. For Wave 2,  
46 which had a slightly longer field period than Wave 1, nonrespondents also received an automated email  
47 reminder 11 days after the initial survey contact.  
48  
49

50 *Completion Rate*  
51

52 Of those who were re-contacted for Wave 2, 80% (n=2,180) completed the survey, resulting in  
53 an overall completion rate of 62%. The sample selection flow diagram is shown in Appendix S2.  
54  
55  
56  
57  
58  
59  
60

## MANUSCRIPT: PUBLIC DISCLOSURE OF INDUSTRY PAYMENTS

Completion rates varied by state and ranged from 40% to 81.8%. Average completion rates for Sunshine and non-Sunshine states did not differ significantly from each other (61.1% and 66.5%, respectively,  $p=0.062$ ).

*Survey Weights*

Our analysis uses survey weights provided by GfK that account for non-coverage, oversampling, and nonresponse/attrition. These GfK weights use, as a benchmark, distributions derived from the 2014 March Supplement Current Population Survey (CPS) so the survey sample matches the US adult population on key demographic dimensions (gender, age, race/Hispanic ethnicity, education, Census region, household income, homeownership status, metropolitan residence, Internet access). Details on the construction of survey weights are documented in Dennis and Thomas (2013).<sup>2</sup>

MANUSCRIPT: PUBLIC DISCLOSURE OF INDUSTRY PAYMENTS

**SUPPLEMENTARY APPENDIX S2**  
**SAMPLE SELECTION FLOW DIAGRAM**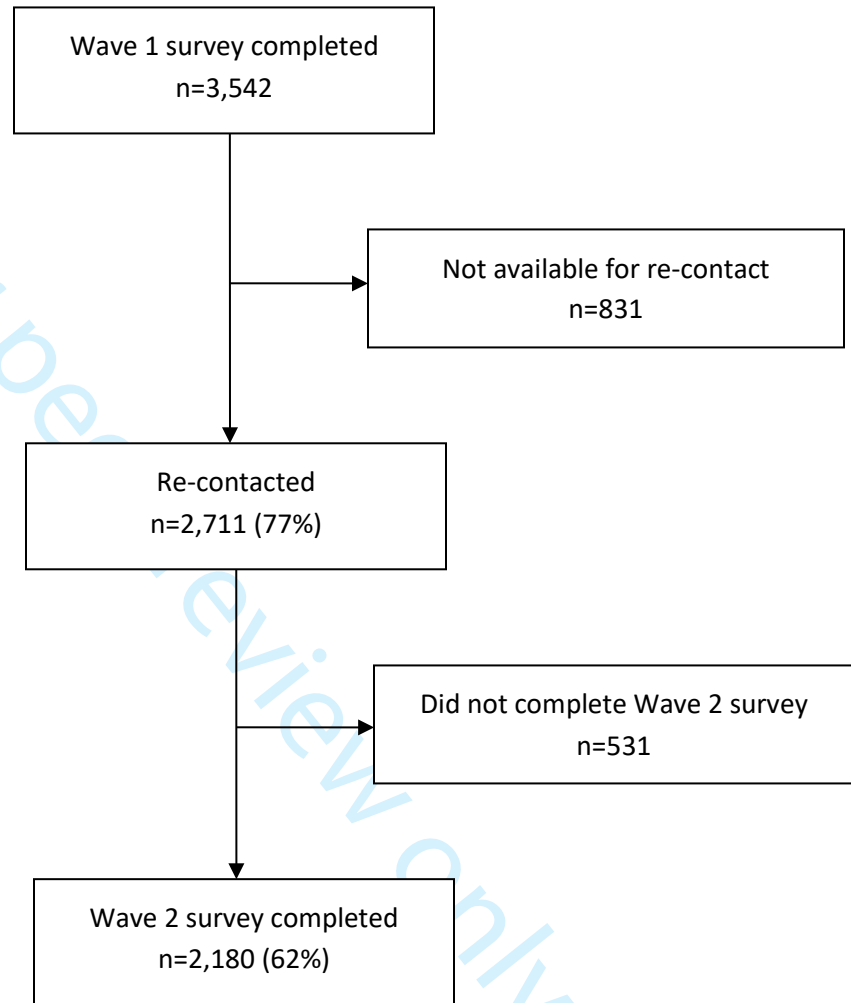



1 MANUSCRIPT: PUBLIC DISCLOSURE OF INDUSTRY PAYMENTS  
2  
3

4 **SUPPLEMENTARY APPENDIX S3**

5 **CHARACTERISTICS OF WAVE 2 RESPONDENTS AND NON-RESPONDENTS**  
6  
7  
8  
9  
10  
11  
12  
13  
14  
15  
16  
17  
18  
19  
20  
21  
22  
23  
24  
25  
26  
27  
28  
29  
30  
31  
32  
33  
34  
35  
36  
37  
38  
39  
40  
41  
42  
43  
44  
45  
46  
47  
48  
49  
50  
51  
52  
53  
54  
55  
56  
57  
58  
59  
60

For peer review only

**Table S3. 2014 Characteristics of Wave 2 Respondents and Non-Respondents**

|                                              | Weighted Distribution %      |                                            | Statistical Significance (Bonferroni correction) <sup>a</sup> |
|----------------------------------------------|------------------------------|--------------------------------------------|---------------------------------------------------------------|
|                                              | Wave 2 respondents (n=2,180) | Not contacted or did not respond (n=1,362) |                                                               |
| Gender                                       |                              |                                            | n.s.                                                          |
| Female                                       | 49%                          | 56%                                        |                                                               |
| Male                                         | 51%                          | 44%                                        |                                                               |
| Race/Ethnicity                               |                              |                                            | **                                                            |
| Caucasian                                    | 70%                          | 60%                                        |                                                               |
| Hispanic                                     | 10%                          | 14%                                        |                                                               |
| Black, Non-Hispanic                          | 13%                          | 19%                                        |                                                               |
| Other                                        | 8%                           | 8%                                         |                                                               |
| Age                                          |                              |                                            | **                                                            |
| <=20                                         | 4%                           | 5%                                         |                                                               |
| 21-30                                        | 17%                          | 23%                                        |                                                               |
| 31-40                                        | 15%                          | 16%                                        |                                                               |
| 41-50                                        | 15%                          | 16%                                        |                                                               |
| 51-60                                        | 22%                          | 18%                                        |                                                               |
| 61+                                          | 27%                          | 22%                                        |                                                               |
| Education                                    |                              |                                            | **                                                            |
| Less than high school                        | 10%                          | 15%                                        |                                                               |
| High school graduate                         | 31%                          | 27%                                        |                                                               |
| Some college                                 | 28%                          | 30%                                        |                                                               |
| College graduate                             | 31%                          | 27%                                        |                                                               |
| Household Income                             |                              |                                            | n.s.                                                          |
| \$0 - \$24,999                               | 16%                          | 21%                                        |                                                               |
| \$25,000 - \$49,999                          | 22%                          | 24%                                        |                                                               |
| \$50,000 - \$74,999                          | 19%                          | 18%                                        |                                                               |
| \$75,000 - \$99,999                          | 16%                          | 15%                                        |                                                               |
| \$100,000+                                   | 28%                          | 23%                                        |                                                               |
| Employment                                   |                              |                                            | **                                                            |
| Employed for pay                             | 52%                          | 48%                                        |                                                               |
| Self-employed                                | 6%                           | 7%                                         |                                                               |
| Retired                                      | 21%                          | 16%                                        |                                                               |
| Not working - disability                     | 7%                           | 8%                                         |                                                               |
| Not working - other                          | 14%                          | 21%                                        |                                                               |
| Urban/Rural                                  |                              |                                            | n.s.                                                          |
| Urban                                        | 16%                          | 16%                                        |                                                               |
| Rural                                        | 84%                          | 84%                                        |                                                               |
| Resides in State with Sunshine Law           |                              |                                            | n.s.                                                          |
| No                                           | 96%                          | 96%                                        |                                                               |
| Yes                                          | 4%                           | 4%                                         |                                                               |
| Self-rated Health                            |                              |                                            | n.s.                                                          |
| Excellent                                    | 13%                          | 15%                                        |                                                               |
| Good                                         | 63%                          | 58%                                        |                                                               |
| Fair                                         | 21%                          | 22%                                        |                                                               |
| Poor                                         | 3%                           | 5%                                         |                                                               |
| Diagnosis of chronic condition <sup>b</sup>  |                              |                                            | n.s.                                                          |
| No                                           | 42%                          | 49%                                        |                                                               |
| Yes                                          | 58%                          | 51%                                        |                                                               |
| Diagnosis of mental health disorder          |                              |                                            | n.s.                                                          |
| No                                           | 83%                          | 80%                                        |                                                               |
| Yes                                          | 17%                          | 20%                                        |                                                               |
| Diagnosis of cancer                          |                              |                                            | n.s.                                                          |
| No                                           | 91%                          | 92%                                        |                                                               |
| Yes                                          | 9%                           | 8%                                         |                                                               |
| Diagnosis of stroke or myocardial infarction |                              |                                            | n.s.                                                          |
| No                                           | 97%                          | 96%                                        |                                                               |
| Yes                                          | 3%                           | 4%                                         |                                                               |
| Any health insurance coverage                |                              |                                            | **                                                            |
| No                                           | 16%                          | 21%                                        |                                                               |
| Yes                                          | 84%                          | 79%                                        |                                                               |

\*\* significant at 0.01 level with Bonferroni correction (0.01/13=0.00077)

\* significant at 0.05 level with Bonferroni correction (0.05/13=0.0038)

n.s. not significant

Percentages may not add up to 100 because of rounding.

Notes:

a. P-values are from chi-squared test of independence with Rao-Scott correction, testing the difference in distribution values between Wave 2 respondents and nonrespondents using base weights. Asterisks indicate significance with Bonferroni correction.

b. Chronic conditions include acid reflux, asthma, COPD, atrial fibrillation, chronic pain, cystic fibrosis, diabetes, epilepsy, eye disease, gout, heart disease, hepatitis C, hypertension, high cholesterol, HIV, kidney disease, multiple sclerosis, osteoarthritis, osteoporosis, rheumatoid arthritis, sleep disorder.

1  
2  
3  
4  
5  
6  
7  
8  
9  
10  
11  
12  
13  
14  
15  
16  
17  
18  
19  
20  
21  
22  
23  
24  
25  
26  
27  
28  
29  
30  
31  
32  
33  
34  
35  
36  
37  
38  
39  
40  
41  
42  
43  
44  
45  
46  
47  
48  
49  
50  
51  
52  
53  
54  
55  
56  
57  
58  
59  
60

MANUSCRIPT: PUBLIC DISCLOSURE OF INDUSTRY PAYMENTS

**SUPPLEMENTARY APPENDIX S4**  
**SURVEY QUESTIONS**

**Awareness and Knowledge of Industry Payments**

1. Some doctors receive payments from pharmaceutical (drug) and medical device companies in the form of small gifts such as pens, mugs, or books; reimbursement for travel and conference presentations; or financial compensation for consulting services. Have you heard about these payments before now?

*Response choices:* Yes; No; Don't know

2. A variety of sources recently began posting information about payments made by pharmaceutical and medical device companies to doctors. Were you aware that this information is available?

*Response choices:* Yes, I was aware; No, I was not aware; Not sure

3. Do you know whether the doctor you've seen most frequently in the past 12 months has received any payments from a pharmaceutical or medical device firm?

*Response choices:* Yes, I know my doctor has received payments; Yes, I know my doctor has not received any payments; No, I do not know whether my doctor has received any payments; Not sure

1  
2  
3  
4  
5  
6  
7  
8  
9  
10  
11  
12  
13  
14  
15  
16  
17  
18  
19  
20  
21  
22  
23  
24  
25  
26  
27  
28  
29  
30  
31  
32  
33  
34  
35  
36  
37  
38  
39  
40  
41  
42  
43  
44  
45  
46  
47  
48  
49  
50  
51  
52  
53  
54  
55  
56  
57  
58  
59  
60

MANUSCRIPT: PUBLIC DISCLOSURE OF INDUSTRY PAYMENTS

**SUPPLEMENTARY APPENDIX S5**  
**FULL REGRESSION RESULTS**

- S5a. Models with individual fixed effects
- S5b. Models without individual fixed effects

For peer review only

**Table S5a. Full Regression Results, Models With Individual Fixed Effects**

|                                             | Dependent variable    |                          |                                  |
|---------------------------------------------|-----------------------|--------------------------|----------------------------------|
|                                             | Awareness of payments | Awareness of public info | Knowledge of own doctor payments |
| Open Payments disclosure                    | 0.0227<br>(0.0312)    | 0.0961<br>(0.0363)       | -0.0011<br>(0.0107)              |
| Age                                         | -0.0347<br>(0.0738)   | -0.0672<br>(0.0625)      | -0.0293<br>(0.0297)              |
| Age squared                                 | -0.0004<br>(0.0003)   | -0.0004<br>(0.0002)      | 0.0001<br>(0.0001)               |
| Less than high school education             | ..                    | ..                       | ..                               |
| High school graduate                        | -0.0523<br>(0.1136)   | -0.1071<br>(0.0667)      | -0.0677<br>(0.0574)              |
| Some college                                | 0.0784<br>(0.1410)    | -0.0230<br>(0.0880)      | -0.0408<br>(0.0571)              |
| College graduate                            | 0.1760<br>(0.1572)    | -0.0341<br>(0.1636)      | -0.0953<br>(0.0714)              |
| Urban residence                             | -0.1190<br>(0.0991)   | 0.0253<br>(0.0526)       | 0.0239<br>(0.0175)               |
| Household income \$0-\$24,999               | ..                    | ..                       | ..                               |
| Household income \$25,000-\$49,999          | 0.0411<br>(0.0526)    | 0.0405<br>(0.0345)       | 0.0352<br>(0.0267)               |
| Household income \$50,000-\$74,999          | 0.0194<br>(0.0918)    | -0.0098<br>(0.0383)      | 0.0147<br>(0.0268)               |
| Household income \$75,000-\$99,999          | 0.0432<br>(0.1088)    | -0.0177<br>(0.0399)      | 0.0176<br>(0.0391)               |
| Household income \$100,000+                 | 0.0608<br>(0.0857)    | 0.0197<br>(0.0529)       | 0.0304<br>(0.0274)               |
| Not employed                                | ..                    | ..                       | ..                               |
| Self-employed                               | 0.0066<br>(0.1079)    | -0.1170<br>(0.0990)      | 0.0123<br>(0.0502)               |
| Employed for pay                            | -0.0209<br>(0.0725)   | -0.0477<br>(0.0594)      | -0.0254<br>(0.0426)              |
| Retired                                     | -0.0492<br>(0.0816)   | 0.0243<br>(0.0767)       | 0.0111<br>(0.0489)               |
| Diagnosis of chronic condition <sup>a</sup> | 0.0407<br>(0.0486)    | 0.0156<br>(0.0408)       | -0.0011<br>(0.0165)              |
| Diagnosis of cancer                         | -0.0979<br>(0.0802)   | -0.0044<br>(0.0440)      | 0.0126<br>(0.0222)               |
| Diagnosis of MI or stroke                   | -0.0346<br>(0.0888)   | 0.0144<br>(0.0682)       | -0.0190<br>(0.0477)              |
| Diagnosis of mental health disorder         | 0.0506<br>(0.0532)    | -0.0066<br>(0.0321)      | -0.0107<br>(0.0274)              |
| Number of office visits                     | 0.0025<br>(0.0038)    | -0.0014<br>(0.0036)      | 0.0002<br>(0.0023)               |
| Number of office visits squared             | 0.0000                | 0.0000                   | 0.0000                           |

|    |                                  |              |             |              |
|----|----------------------------------|--------------|-------------|--------------|
| 1  |                                  |              |             |              |
| 2  |                                  | (0.0001)     | (0.0001)    | (0.0000)     |
| 3  | Health insurance coverage        | 0.0402       | 0.0341      | 0.0119       |
| 4  |                                  | (0.0605)     | (0.0554)    | (0.0113)     |
| 5  |                                  |              |             |              |
| 6  | Year fixed effects               | YES          | YES         | YES          |
| 7  | Individual fixed effects         | YES          | YES         | YES          |
| 8  |                                  |              |             |              |
| 9  | F-statistic (degrees of freedom) | 3.64 (22,49) | 2.7 (22,49) | 2.46 (22,49) |
| 10 | R <sup>2</sup>                   | 0.7602       | 0.6452      | 0.6709       |
| 11 |                                  |              |             |              |
| 12 |                                  |              |             |              |
| 13 | Sample Size                      | 2,028        | 2,030       | 2,030        |

Standard errors clustered at the state level, reported in parentheses.

Notes:

a. Chronic conditions include acid reflux, asthma, COPD, atrial fibrillation, chronic pain, cystic fibrosis, diabetes, epilepsy, eye disease, gout, heart disease, hepatitis C, hypertension, high cholesterol, HIV, kidney disease, multiple sclerosis, osteoarthritis, osteoporosis, rheumatoid arthritis, sleep disorder.

**Table S5b. Full Regression Results, Models Without Individual Fixed Effects**

|                                      | Dependent variable    |                          |                                  |
|--------------------------------------|-----------------------|--------------------------|----------------------------------|
|                                      | Awareness of payments | Awareness of public info | Knowledge of own doctor payments |
| Open Payments disclosure             | 0.0234<br>(0.0229)    | 0.1018<br>(0.0244)       | 0.0004<br>(0.0070)               |
| Non-Sunshine state resident          | -0.0223<br>(0.0182)   | -0.0824<br>(0.0126)      | -0.0025<br>(0.0051)              |
| Post-Open Payments year <sup>a</sup> | 0.0608<br>(0.0149)    | -0.0738<br>(0.0230)      | -0.0125<br>(0.0039)              |
| Age                                  | 0.0066<br>(0.0030)    | 0.0009<br>(0.0022)       | -0.0024<br>(0.0014)              |
| Age squared                          | -0.0001<br>(0.0000)   | 0.0000<br>(0.0000)       | 0.0000<br>(0.0000)               |
| Less than high school education      | ..                    | ..                       | ..                               |
| High school graduate                 | 0.0828<br>(0.0254)    | 0.0170<br>(0.0195)       | -0.0179<br>(0.0216)              |
| Some college                         | 0.1971<br>(0.0265)    | 0.0430<br>(0.0178)       | -0.0149<br>(0.0208)              |
| College graduate                     | 0.2933<br>(0.0363)    | 0.0919<br>(0.0197)       | -0.0067<br>(0.0217)              |
| Caucasian                            | ..                    | ..                       | ..                               |
| Black, non-Hispanic                  | -0.1722<br>(0.0274)   | -0.0364<br>(0.0120)      | 0.0029<br>(0.0167)               |
| Hispanic                             | -0.1003<br>(0.0372)   | 0.0041<br>(0.0187)       | 0.0031<br>(0.0114)               |
| Other/Multi                          | -0.0402<br>(0.0426)   | 0.0334<br>(0.0307)       | 0.0141<br>(0.0253)               |
| Female                               | -0.0212<br>(0.0237)   | -0.0358<br>(0.0154)      | 0.0253<br>(0.0071)               |
| Urban residence                      | 0.0059<br>(0.0362)    | -0.0027<br>(0.0210)      | 0.0170<br>(0.0079)               |
| Household income \$0-\$24,999        | ..                    | ..                       | ..                               |
| Household income \$25,000-\$49,999   | 0.0985<br>(0.0250)    | 0.0161<br>(0.0168)       | -0.0045<br>(0.0172)              |
| Household income \$50,000-\$74,999   | 0.1446<br>(0.0249)    | 0.0086<br>(0.0185)       | 0.0173<br>(0.0161)               |
| Household income \$75,000-\$99,999   | 0.1619<br>(0.0372)    | 0.0077<br>(0.0172)       | -0.0044<br>(0.0176)              |
| Household income \$100,000+          | 0.1898<br>(0.0261)    | 0.0251<br>(0.0171)       | -0.0135<br>(0.0153)              |
| Not employed                         | ..                    | ..                       | ..                               |
| Self-employed                        | 0.1070<br>(0.0385)    | -0.0080<br>(0.0289)      | -0.0158<br>(0.0127)              |
| Employed for pay                     | 0.0478<br>(0.0211)    | 0.0063<br>(0.0136)       | -0.0171<br>(0.0094)              |
| Retired                              | 0.0938                | 0.0194                   | -0.0079                          |

|    |                                             |                |               |               |
|----|---------------------------------------------|----------------|---------------|---------------|
| 1  |                                             |                |               |               |
| 2  |                                             | (0.0283)       | (0.0216)      | (0.0087)      |
| 3  | Diagnosis of chronic condition <sup>b</sup> | 0.0842         | 0.0069        | 0.0033        |
| 4  |                                             | (0.0273)       | (0.0180)      | (0.0140)      |
| 5  | Diagnosis of cancer                         | 0.0155         | -0.0202       | 0.0185        |
| 6  |                                             | (0.0335)       | (0.0198)      | (0.0152)      |
| 7  | Diagnosis of MI or stroke                   | 0.0344         | 0.0781        | 0.0261        |
| 8  |                                             | (0.0447)       | (0.0487)      | (0.0190)      |
| 9  | Diagnosis of mental health disorder         | 0.0484         | -0.0004       | -0.0043       |
| 10 |                                             | (0.0335)       | (0.0205)      | (0.0106)      |
| 11 | Number of office visits                     | 0.0098         | 0.0022        | 0.0019        |
| 12 |                                             | (0.0033)       | (0.0023)      | (0.0011)      |
| 13 | Number of office visits squared             | -0.0001        | 0.0000        | 0.0000        |
| 14 |                                             | (0.0000)       | (0.0000)      | (0.0000)      |
| 15 | Health insurance coverage                   | 0.0193         | -0.0068       | -0.0016       |
| 16 |                                             | (0.0278)       | (0.0194)      | (0.0155)      |
| 17 |                                             |                |               |               |
| 18 |                                             |                |               |               |
| 19 | Year fixed effects <sup>a</sup>             | YES            | YES           | YES           |
| 20 | Individual fixed effects                    | NO             | NO            | NO            |
| 21 |                                             |                |               |               |
| 22 | F-statistic (degrees of freedom)            | 101.02 (27,49) | 20.87 (27,49) | 15.25 (27,49) |
| 23 | R <sup>2</sup>                              | 0.1399         | 0.0266        | 0.0164        |
| 24 |                                             |                |               |               |
| 25 | Sample Size                                 | 2,028          | 2,030         | 2,030         |

Standard errors clustered at the state level, reported in parentheses.

Notes:

a. Coefficient on year fixed effect reported as coefficient on Post-Open Payments year.

a. Chronic conditions include acid reflux, asthma, COPD, atrial fibrillation, chronic pain, cystic fibrosis, diabetes, epilepsy, eye disease, gout, heart disease, hepatitis C, hypertension, high cholesterol, HIV, kidney disease, multiple sclerosis, osteoarthritis, osteoporosis, rheumatoid arthritis, sleep disorder.



1  
2  
3  
4  
5  
6  
7  
8  
9  
10  
11  
12  
13  
14  
15  
16  
17  
18  
19  
20  
21  
22  
23  
24  
25  
26  
27  
28  
29  
30  
31  
32  
33  
34  
35  
36  
37  
38  
39  
40  
41  
42  
43  
44  
45  
46  
47  
48  
49  
50  
51  
52  
53  
54  
55  
56  
57  
58  
59  
60

MANUSCRIPT: PUBLIC DISCLOSURE OF INDUSTRY PAYMENTS

**SUPPLEMENTARY APPENDIX S6**  
**ALTERNATIVE SPECIFICATIONS**

S6a. Unweighted models

S6b. Regression-adjusted models without individual fixed effects

S6c. Regression-adjusted models that include an indicator for Medicaid expansion

S6d. Medicaid expansion states only

For peer review only

**Table S6a. Alternative Specification: Unweighted Models**

|                                                                       | Mean or Percentage |       | Change<br>2014-16 | Difference-in-Difference Estimates    |                                                                      | P value <sup>b</sup> |
|-----------------------------------------------------------------------|--------------------|-------|-------------------|---------------------------------------|----------------------------------------------------------------------|----------------------|
|                                                                       | 2014               | 2016  |                   | Unadjusted<br>Difference in<br>Change | Regression-Adjusted<br>Difference in<br>Change (95% CI) <sup>a</sup> |                      |
|                                                                       |                    |       |                   |                                       |                                                                      |                      |
| <b>Awareness and Knowledge of Industry Payments (% Answering Yes)</b> |                    |       |                   |                                       |                                                                      |                      |
| Aware of industry payments                                            |                    |       |                   |                                       |                                                                      |                      |
| Non-Sunshine states                                                   | 49.7%              | 58.1% | 8.4%              | 2.8%                                  | 2.3% (-3.2%,7.7%)                                                    | 0.4031               |
| Sunshine states                                                       | 58.9%              | 64.5% | 5.6%              |                                       |                                                                      |                      |
| Aware that industry payments info publicly available                  |                    |       |                   |                                       |                                                                      |                      |
| Non-Sunshine states                                                   | 10.9%              | 13.0% | 2.1%              | 11.3%                                 | 11.3% (8.6%,13.9%)                                                   | <0.0001**            |
| Sunshine states                                                       | 20.9%              | 11.7% | -9.2%             |                                       |                                                                      |                      |
| Know whether own doctor has received industry payments                |                    |       |                   |                                       |                                                                      |                      |
| Non-Sunshine states                                                   | 4.4%               | 2.9%  | -1.5%             | 0.0%                                  | 0.0% (-2.0%,2.0%)                                                    | 0.9828               |
| Sunshine states                                                       | 4.1%               | 2.5%  | -1.5%             |                                       |                                                                      |                      |

Analyses of awareness and knowledge measures based on balanced panel of individuals with non-missing survey items who responded to both 2014 and 2016 surveys: 1,831 non-Sunshine residents and 197 Sunshine residents for awareness of payments; 1,834 non-Sunshine residents and 196 Sunshine residents for awareness that payments information was public and for knowledge of whether own doctor had received payments.

Notes:

a. Regression models include age, education categories, urban residence, household income categories, employment categories, previous diagnosis of chronic conditions (which include acid reflux, asthma, COPD, atrial fibrillation, chronic pain, cystic fibrosis, diabetes, epilepsy, eye disease, gout, heart disease, hepatitis C, hypertension, high cholesterol, HIV, kidney disease, multiple sclerosis, osteoarthritis, osteoporosis, rheumatoid arthritis, sleep disorder), previous diagnosis of cancer, previous diagnosis of stroke or myocardial infarction, previous diagnosis of mental health disorder, number of visits to the doctor, whether insured, quadratic terms of age and number of visits to account for non-linearities in age and visits, and year and individual fixed effects. All analyses used GfK-constructed weights that adjusted for non-coverage, nonresponse, oversampling, and attrition. Standard errors were clustered at the state level.

b. Reported P values for regression-adjusted change.

**Table S6b. Alternative Specification: Regression-Adjusted Models Without Individual Fixed Effects**

|                                                                       | Mean or Percentage |       | Change<br>2014-16 | Difference-in-Difference Estimates    |                                                                      | P value <sup>b</sup> |
|-----------------------------------------------------------------------|--------------------|-------|-------------------|---------------------------------------|----------------------------------------------------------------------|----------------------|
|                                                                       | 2014               | 2016  |                   | Unadjusted<br>Difference in<br>Change | Regression-Adjusted<br>Difference in<br>Change (95% CI) <sup>a</sup> |                      |
|                                                                       |                    |       |                   |                                       |                                                                      |                      |
| <b>Awareness and Knowledge of Industry Payments (% Answering Yes)</b> |                    |       |                   |                                       |                                                                      |                      |
| Aware of industry payments                                            |                    |       |                   |                                       |                                                                      |                      |
| Non-Sunshine states                                                   | 45.5%              | 54.1% | 8.7%              | 3.1%                                  | 2.3% (-2.3%,6.9%)                                                    | 0.3128               |
| Sunshine states                                                       | 58.0%              | 63.6% | 5.6%              |                                       |                                                                      |                      |
| Aware that industry payments info publicly available                  |                    |       |                   |                                       |                                                                      |                      |
| Non-Sunshine states                                                   | 9.8%               | 12.9% | 3.2%              | 9.9%                                  | 10.2% (5.3%,15.1%)                                                   | 0.0001**             |
| Sunshine states                                                       | 19.4%              | 12.6% | -6.7%             |                                       |                                                                      |                      |
| Know whether own doctor has received industry payments                |                    |       |                   |                                       |                                                                      |                      |
| Non-Sunshine states                                                   | 4.4%               | 3.1%  | -1.3%             | -0.2%                                 | 0.0% (-1.4%,1.5%)                                                    | 0.9583               |
| Sunshine states                                                       | 3.8%               | 2.7%  | -1.1%             |                                       |                                                                      |                      |

Analyses of awareness and knowledge measures based on balanced panel of individuals with non-missing survey items who responded to both 2014 and 2016 surveys: 1,831 non-Sunshine residents and 197 Sunshine residents for awareness of payments; 1,834 non-Sunshine residents and 196 Sunshine residents for awareness that payments information was public and for knowledge of whether own doctor had received payments.

Notes:

a. Regression models include age, education categories, urban residence, household income categories, employment categories, previous diagnosis of chronic conditions (which include acid reflux, asthma, COPD, atrial fibrillation, chronic pain, cystic fibrosis, diabetes, epilepsy, eye disease, gout, heart disease, hepatitis C, hypertension, high cholesterol, HIV, kidney disease, multiple sclerosis, osteoarthritis, osteoporosis, rheumatoid arthritis, sleep disorder), previous diagnosis of cancer, previous diagnosis of stroke or myocardial infarction, previous diagnosis of mental health disorder, number of visits to the doctor, whether insured, quadratic terms of age and number of visits to account for non-linearities in age and visits, indicator for non-Sunshine state, indicator for post-Open Payments year (2016), interaction between non-Sunshine state indicator and post-Open Payments year indicator, gender, and race/ethnicity categories. All analyses used Gfk-constructed weights that adjusted for non-coverage, nonresponse, oversampling, and attrition. Standard errors were clustered at the state level.

b. Reported P values for regression-adjusted change.

Table S6c. Alternative Specification: Regression-Adjusted Models that Include an Indicator for Medicaid Expansion

|                                                        | Mean or Percentage                                                    |       | Change<br>2014-16 | Difference-in-Difference Estimates    |                                                                      | P value <sup>b</sup> |
|--------------------------------------------------------|-----------------------------------------------------------------------|-------|-------------------|---------------------------------------|----------------------------------------------------------------------|----------------------|
|                                                        | 2014                                                                  | 2016  |                   | Unadjusted<br>Difference in<br>Change | Regression-Adjusted<br>Difference in<br>Change (95% CI) <sup>a</sup> |                      |
|                                                        | <b>Awareness and Knowledge of Industry Payments (% Answering Yes)</b> |       |                   |                                       |                                                                      |                      |
| Aware of industry payments                             |                                                                       |       |                   |                                       |                                                                      |                      |
| Non-Sunshine states                                    | 45.5%                                                                 | 54.1% | 8.7%              | 3.1%                                  | 1.6% (-4.6%,7.7%)                                                    | 0.6127               |
| Sunshine states                                        | 58.0%                                                                 | 63.6% | 5.6%              |                                       |                                                                      |                      |
| Aware that industry payments info publicly available   |                                                                       |       |                   |                                       |                                                                      |                      |
| Non-Sunshine states                                    | 9.8%                                                                  | 12.9% | 3.2%              | 9.9%                                  | 8.8% (1.4%,16.1%)                                                    | 0.0203*              |
| Sunshine states                                        | 19.4%                                                                 | 12.6% | -6.7%             |                                       |                                                                      |                      |
| Know whether own doctor has received industry payments |                                                                       |       |                   |                                       |                                                                      |                      |
| Non-Sunshine states                                    | 4.4%                                                                  | 3.1%  | -1.3%             | -0.2%                                 | -0.1% (-2.3%,2.1%)                                                   | 0.9206               |
| Sunshine states                                        | 3.8%                                                                  | 2.7%  | -1.1%             |                                       |                                                                      |                      |

Analyses of awareness and knowledge measures based on balanced panel of individuals with non-missing survey items who responded to both 2014 and 2016 surveys: 1,831 non-Sunshine residents and 197 Sunshine residents for awareness of payments; 1,834 non-Sunshine residents and 196 Sunshine residents for awareness that payments information was public and for knowledge of whether own doctor had received payments.

Notes:

a. Regression models include age, education categories, urban residence, household income categories, employment categories, previous diagnosis of chronic conditions (which include acid reflux, asthma, COPD, atrial fibrillation, chronic pain, cystic fibrosis, diabetes, epilepsy, eye disease, gout, heart disease, hepatitis C, hypertension, high cholesterol, HIV, kidney disease, multiple sclerosis, osteoarthritis, osteoporosis, rheumatoid arthritis, sleep disorder), previous diagnosis of cancer, previous diagnosis of stroke or myocardial infarction, previous diagnosis of mental health disorder, number of visits to the doctor, whether insured, quadratic terms of age and number of visits to account for non-linearities in age and visits, and year and individual fixed effects. All analyses used GfK-constructed weights that adjusted for non-coverage, nonresponse, oversampling, and attrition. Standard errors were clustered at the state level.

b. Reported P values for regression-adjusted change.

**Table S6d. Alternative Specification: Medicaid Expansion States Only**

|                                                                       | Mean or Percentage |       | Change<br>2014-16 | Difference-in-Difference Estimates    |                                                                      | P value <sup>b</sup> |
|-----------------------------------------------------------------------|--------------------|-------|-------------------|---------------------------------------|----------------------------------------------------------------------|----------------------|
|                                                                       | 2014               | 2016  |                   | Unadjusted<br>Difference in<br>Change | Regression-Adjusted<br>Difference in<br>Change (95% CI) <sup>a</sup> |                      |
|                                                                       |                    |       |                   |                                       |                                                                      |                      |
| <b>Awareness and Knowledge of Industry Payments (% Answering Yes)</b> |                    |       |                   |                                       |                                                                      |                      |
| Aware of industry payments                                            |                    |       |                   |                                       |                                                                      |                      |
| Non-Sunshine states                                                   | 44.5%              | 53.2% | 8.7%              | 3.1%                                  | 2.1% (-4.8%,8.9%)                                                    | 0.5414               |
| Sunshine states                                                       | 58.0%              | 63.6% | 5.6%              |                                       |                                                                      |                      |
| Aware that industry payments info publicly available                  |                    |       |                   |                                       |                                                                      |                      |
| Non-Sunshine states                                                   | 9.3%               | 14.5% | 5.3%              | 12.0%                                 | 11.6% (3.8%,19.3%)                                                   | 0.0045**             |
| Sunshine states                                                       | 19.4%              | 12.6% | -6.7%             |                                       |                                                                      |                      |
| Know whether own doctor has received industry payments                |                    |       |                   |                                       |                                                                      |                      |
| Non-Sunshine states                                                   | 4.0%               | 2.9%  | -1.1%             | 0.0%                                  | 0.2% (-2.0%,2.4%)                                                    | 0.8694               |
| Sunshine states                                                       | 3.8%               | 2.7%  | -1.1%             |                                       |                                                                      |                      |

Analyses of awareness and knowledge measures based on balanced panel of individuals with non-missing survey items who responded to both 2014 and 2016 surveys and resided in Medicaid expansion states: 1,101 non-Sunshine residents and 197 Sunshine residents for awareness of payments; 1,093 non-Sunshine residents and 196 Sunshine residents for awareness that payments information was public; 1,094 non-Sunshine residents and 197 Sunshine residents for knowledge of whether own doctor had received payments.

Notes:

a. Regression models include age, education categories, urban residence, household income categories, employment categories, previous diagnosis of chronic conditions (which include acid reflux, asthma, COPD, atrial fibrillation, chronic pain, cystic fibrosis, diabetes, epilepsy, eye disease, gout, heart disease, hepatitis C, hypertension, high cholesterol, HIV, kidney disease, multiple sclerosis, osteoarthritis, osteoporosis, rheumatoid arthritis, sleep disorder), previous diagnosis of cancer, previous diagnosis of stroke or myocardial infarction, previous diagnosis of mental health disorder, number of visits to the doctor, whether insured, quadratic terms of age and number of visits to account for non-linearities in age and visits, and year and individual fixed effects. All analyses used GfK-constructed weights that adjusted for non-coverage, nonresponse, oversampling, and attrition. Standard errors were clustered at the state level.

b. Reported P values for regression-adjusted change.

1 MANUSCRIPT: PUBLIC DISCLOSURE OF INDUSTRY PAYMENTS  
2  
3

4 **REFERENCES FOR SUPPLEMENTARY APPENDIX**  
5

- 6  
7 1. Dennis JM, Thomas RK. Documentation for human subjects review committees: GfK company  
8 information, past external review, confidentiality, and privacy protections for panelists.  
9 <http://www.knowledgenetworks.com/ganp/irbsupport>. Updated 2013. Accessed April 26, 2018.  
10  
11 2. Pham-Kanter G, Mello MM, Lehmann LS, Campbell EG, Carpenter D. Public awareness of and  
12 contact with physicians who receive industry payments: a national survey. *J Gen Intern Med*  
13 2017. DOI: 10.1007/s11606-017-4012-3.  
14  
15  
16  
17  
18  
19  
20  
21  
22  
23  
24  
25  
26  
27  
28  
29  
30  
31  
32  
33  
34  
35  
36  
37  
38  
39  
40  
41  
42  
43  
44  
45  
46  
47  
48  
49  
50  
51  
52  
53  
54  
55  
56  
57  
58  
59  
60

## STROBE (Strengthening The Reporting of OBServational Studies in Epidemiology) Checklist

A checklist of items that should be included in reports of observational studies. You must report the page number in your manuscript where you consider each of the items listed in this checklist. If you have not included this information, either revise your manuscript accordingly before submitting or note N/A.

**Note:** An Explanation and Elaboration article discusses each checklist item and gives methodological background and published examples of transparent reporting. The STROBE checklist is best used in conjunction with this article (freely available on the Web sites of PLoS Medicine at <http://www.plosmedicine.org/>, Annals of Internal Medicine at <http://www.annals.org/>, and Epidemiology at <http://www.epidem.com/>). Information on the STROBE Initiative is available at [www.strobe-statement.org](http://www.strobe-statement.org).

| Section and Item     | Item No. | Recommendation                                                                                                                                                                                                                                                                                                                                                                                                                                                                 | Reported on Page No. |
|----------------------|----------|--------------------------------------------------------------------------------------------------------------------------------------------------------------------------------------------------------------------------------------------------------------------------------------------------------------------------------------------------------------------------------------------------------------------------------------------------------------------------------|----------------------|
| Title and Abstract   | 1        | (a) Indicate the study's design with a commonly used term in the title or the abstract                                                                                                                                                                                                                                                                                                                                                                                         |                      |
|                      |          | (b) Provide in the abstract an informative and balanced summary of what was done and what was found                                                                                                                                                                                                                                                                                                                                                                            |                      |
| <b>Introduction</b>  |          |                                                                                                                                                                                                                                                                                                                                                                                                                                                                                |                      |
| Background/Rationale | 2        | Explain the scientific background and rationale for the investigation being reported                                                                                                                                                                                                                                                                                                                                                                                           |                      |
| Objectives           | 3        | State specific objectives, including any prespecified hypotheses                                                                                                                                                                                                                                                                                                                                                                                                               |                      |
| <b>Methods</b>       |          |                                                                                                                                                                                                                                                                                                                                                                                                                                                                                |                      |
| Study Design         | 4        | Present key elements of study design early in the paper                                                                                                                                                                                                                                                                                                                                                                                                                        |                      |
| Setting              | 5        | Describe the setting, locations, and relevant dates, including periods of recruitment, exposure, follow-up, and data collection                                                                                                                                                                                                                                                                                                                                                |                      |
| Participants         | 6        | (a) <i>Cohort study</i> —Give the eligibility criteria, and the sources and methods of selection of participants. Describe methods of follow-up<br><br><i>Case-control study</i> —Give the eligibility criteria, and the sources and methods of case ascertainment and control selection. Give the rationale for the choice of cases and controls<br><br><i>Cross-sectional study</i> —Give the eligibility criteria, and the sources and methods of selection of participants |                      |
|                      |          | (b) <i>Cohort study</i> —For matched studies, give matching criteria and number of exposed and unexposed<br><br><i>Case-control study</i> —For matched studies, give matching criteria and the number of controls per case                                                                                                                                                                                                                                                     |                      |
| Variables            | 7        | Clearly define all outcomes, exposures, predictors, potential confounders, and effect modifiers. Give diagnostic criteria, if applicable                                                                                                                                                                                                                                                                                                                                       |                      |

| Section and Item             | Item No. | Recommendation                                                                                                                                                                                                                                                                                                    | Reported on Page No. |
|------------------------------|----------|-------------------------------------------------------------------------------------------------------------------------------------------------------------------------------------------------------------------------------------------------------------------------------------------------------------------|----------------------|
| Data Sources/<br>Measurement | 8*       | For each variable of interest, give sources of data and details of methods of assessment (measurement). Describe comparability of assessment methods if there is more than one group                                                                                                                              |                      |
| Bias                         | 9        | Describe any efforts to address potential sources of bias                                                                                                                                                                                                                                                         |                      |
| Study Size                   | 10       | Explain how the study size was arrived at                                                                                                                                                                                                                                                                         |                      |
| Quantitative Variables       | 11       | Explain how quantitative variables were handled in the analyses. If applicable, describe which groupings were chosen and why                                                                                                                                                                                      |                      |
| Statistical Methods          | 12       | (a) Describe all statistical methods, including those used to control for confounding                                                                                                                                                                                                                             |                      |
|                              |          | (b) Describe any methods used to examine subgroups and interactions                                                                                                                                                                                                                                               |                      |
|                              |          | (c) Explain how missing data were addressed                                                                                                                                                                                                                                                                       |                      |
|                              |          | (d) <i>Cohort study</i> —If applicable, explain how loss to follow-up was addressed<br><br><i>Case-control study</i> —If applicable, explain how matching of cases and controls was addressed<br><br><i>Cross-sectional study</i> —If applicable, describe analytical methods taking account of sampling strategy |                      |
|                              |          | (e) Describe any sensitivity analyses                                                                                                                                                                                                                                                                             |                      |
| <b>Results</b>               |          |                                                                                                                                                                                                                                                                                                                   |                      |
| Participants                 | 13*      | (a) Report numbers of individuals at each stage of study—eg numbers potentially eligible, examined for eligibility, confirmed eligible, included in the study, completing follow-up, and analysed                                                                                                                 |                      |
|                              |          | (b) Give reasons for non-participation at each stage                                                                                                                                                                                                                                                              |                      |
|                              |          | (c) Consider use of a flow diagram                                                                                                                                                                                                                                                                                |                      |
| Descriptive Data             | 14*      | (a) Give characteristics of study participants (eg demographic, clinical, social) and information on exposures and potential confounders                                                                                                                                                                          |                      |
|                              |          | (b) Indicate number of participants with missing data for each variable of interest                                                                                                                                                                                                                               |                      |
|                              |          | (c) <i>Cohort study</i> —Summarise follow-up time (eg, average and total amount)                                                                                                                                                                                                                                  |                      |
| Outcome Data                 | 15*      | <i>Cohort study</i> —Report numbers of outcome events or summary measures over time                                                                                                                                                                                                                               |                      |
|                              |          | <i>Case-control study</i> —Report numbers in each exposure category, or summary measures of exposure                                                                                                                                                                                                              |                      |
|                              |          | <i>Cross-sectional study</i> —Report numbers of outcome events or summary measures                                                                                                                                                                                                                                |                      |



| Section and Item         | Item No. | Recommendation                                                                                                                                                                                               | Reported on Page No. |
|--------------------------|----------|--------------------------------------------------------------------------------------------------------------------------------------------------------------------------------------------------------------|----------------------|
| Main Results             | 16       | (a) Give unadjusted estimates and, if applicable, confounder-adjusted estimates and their precision (eg, 95% confidence interval). Make clear which confounders were adjusted for and why they were included |                      |
|                          |          | (b) Report category boundaries when continuous variables were categorized                                                                                                                                    |                      |
|                          |          | (c) If relevant, consider translating estimates of relative risk into absolute risk for a meaningful time period                                                                                             |                      |
| Other Analyses           | 17       | Report other analyses done—eg analyses of subgroups and interactions, and sensitivity analyses                                                                                                               |                      |
| <b>Discussion</b>        |          |                                                                                                                                                                                                              |                      |
| Key Results              | 18       | Summarise key results with reference to study objectives                                                                                                                                                     |                      |
| Limitations              | 19       | Discuss limitations of the study, taking into account sources of potential bias or imprecision. Discuss both direction and magnitude of any potential bias                                                   |                      |
| Interpretation           | 20       | Give a cautious overall interpretation of results considering objectives, limitations, multiplicity of analyses, results from similar studies, and other relevant evidence                                   |                      |
| Generalisability         | 21       | Discuss the generalisability (external validity) of the study results                                                                                                                                        |                      |
| <b>Other Information</b> |          |                                                                                                                                                                                                              |                      |
| Funding                  | 22       | Give the source of funding and the role of the funders for the present study and, if applicable, for the original study on which the present article is based                                                |                      |

\*Give information separately for cases and controls in case-control studies and, if applicable, for exposed and unexposed groups in cohort and cross-sectional studies.

**Once you have completed this checklist, please save a copy and upload it as part of your submission. DO NOT include this checklist as part of the main manuscript document. It must be uploaded as a separate file.**
